# Supplementary material for: Tuning the circularly polarized phosphorescence of platinum(ii) complexes through a chiral cation strategy
Source: Royal Society of Chemistry journal article supplement (doi:10.1039/d4mh01105h), 2024-01-01
Supplement: d4mh01105h1.pdf [file d4mh01105h1.pdf]

## Supporting Information

### Tuning the Circularly Polarized Phosphorescence of Platinum(II) Complexes through Chiral Cation Strategy

Jiajia Ren,<sup>†a</sup> Tengfei He,<sup>†ad</sup> Haolin Lu,<sup>a</sup> Hebin Wang,<sup>a</sup> Tianyin Shao,<sup>a</sup> Zhaoyu Wang,<sup>a</sup> Yunxin Zhang,<sup>a</sup> Sehrish Gull,<sup>a</sup> Yun Chi,<sup>b</sup> Yu-Wu Zhong,<sup>c</sup> Yongsheng Chen<sup>d</sup> and Guankui Long<sup>\*a</sup>

- 
- <sup>a.</sup> *Tianjin Key Lab for Rare Earth Materials and Applications, Renewable Energy Conversion and Storage Center (RECAST), Smart Sensing Interdisciplinary Science Center, School of Materials Science and Engineering, Nankai University, Tianjin 300350, China. E-mail: longgk09@nankai.edu.cn.*
- <sup>b.</sup> *Department of Materials Science and Engineering, Department of Chemistry, Center of Super-Diamond and Advanced Films (COSDAF), City University of Hong Kong, Hong Kong SAR 999077, China.*
- <sup>c.</sup> *CAS Key Laboratory of Photochemistry, Institute of Chemistry, Chinese Academy of Sciences, Beijing 100190, China.*
- <sup>d.</sup> *The Centre of Nanoscale Science and Technology and State Key Laboratory of Elemento-Organic Chemistry, Frontiers Science Center for New Organic Matter, College of Chemistry, Nankai University, Tianjin 300071, China.*

<sup>†</sup> These authors contributed equally to this work.

# I Experimental Section

## 1 Materials

All solution chemicals were commercial available and used as-received without any other refinement unless otherwise specified including *R*-methylbenzylamine (*R*-MBA,  $\geq 99\%$ , Aladdin), *S*-methylbenzylamine (*S*-MBA,  $\geq 99\%$ , Aladdin), potassium tetrachloroplatinate(II) ( $K_2PtCl_4$ , 99%, Energy), 2-phenylpyridine (Hppy, 98%, HEOWNS), *R*-3-aminobutanoic acid hydrochloride (*R*-ABA·Cl, 96%, Bide), *S*-3-aminobutanoic acid hydrochloride (*S*-ABA·Cl, 96%, Bide), 1,4-dioxan (99%, GAOFENG), methanol (99%, Aladdin) and trichloromethane (CF, 99.9% , GAOFENG).

## 2 Experimental methods

### 2.1 Synthesis of $[Pt(ppy)(\mu-Cl)]_2$ .

Potassium tetrachloroplatinate (II) (0.85 g, 2.0 mmol) in water (40 ml) was added to a stirred solution of 2-phenylpyridine (0.32 g, 2.1 mmol) in 1,4-dioxan (40 ml).<sup>1</sup> After being stirred at room temperature for three days, the mixture was heated under reflux for three more days. The resulting yellow precipitate was filtered out, and washed successively with 1,4-dioxan, water, methanol, and dichloromethane. The obtained precipitates were dried to get the  $[Pt(ppy)(\mu-Cl)]_2$  dimer as a yellow microcrystalline solid (0.57 g, 72%). The  $^1H$  NMR and  $^{13}C$  NMR spectra of  $[Pt(ppy)(\mu-Cl)]_2$  are shown in Figures S23 and S24.  $^1H$  NMR (400 MHz,  $DMSO-d_6$ )  $\delta$  9.49 (d,  $J = 5.7$  Hz, 1H), 8.22 (dd,  $J = 7.6, 1.3$  Hz, 1H), 8.19 – 8.09 (m, 2H), 7.78 (dd,  $J = 7.4, 1.6$  Hz, 1H), 7.51 (td,  $J = 6.3, 2.3$  Hz, 1H), 7.16 (ddd,  $J = 9.2, 7.3, 1.5$  Hz, 2H).  $^{13}C$  NMR(101 MHz,  $DMSO-d_6$ ):  $\delta$  165.09 (s), 149.31 (s), 144.54 (s), 141.56 (s), 140.31 (s), 133.55 (s), 130.08 (s), 124.94-124.72 (m), 124.33 (s), 122.82 (s), 119.52 (s).

### 2.2 Synthesis of *R/S*-ABA· $[Pt(ppy)Cl_2]$ .

A mixture of  $[Pt(ppy)(\mu-Cl)]_2$  (78.5 mg, 0.1 mmol) and *R/S*-ABACl (27.9 mg, 0.2 mmol) in chloroform (5 mL) was stirred at room temperature for four days.<sup>2</sup> The reaction mixture was filtered and evaporated for getting yellow solid . Yield, 96 mg (0.14 mmol, 92%); The  $^1H$  NMR and  $^{13}C$  NMR spectra of *R/S*-ABA· $[Pt(ppy)Cl_2]$  are

shown in Figures S25 to S28.  $^1\text{H}$  NMR (*R*-ABA·[Pt(ppy)Cl<sub>2</sub>], 400 MHz, DMSO-*d*<sub>6</sub>):  $\delta$  12.70 (s, 1H), 9.48 (d,  $J = 6.0$  Hz, 1H), 8.15 (td,  $J = 18.4, 15.7, 7.8$  Hz, 6H), 7.78 (d,  $J = 7.3$  Hz, 1H), 7.51 (s, 1H), 7.16 (p,  $J = 7.3$  Hz, 2H), 3.44 (h,  $J = 6.9$  Hz, 1H), 2.68 (dd,  $J = 16.7, 5.8$  Hz, 1H), 2.56 (m, 1H), 1.22 (d,  $J = 6.5$  Hz, 3H).  $^{13}\text{C}$  NMR (*R*-ABA·[Pt(ppy)Cl<sub>2</sub>], 101 MHz, DMSO-*d*<sub>6</sub>):  $\delta$  172.00 (s), 165.52 (s), 149.73 (s), 144.98 (s), 142.06 (s), 140.70 (s), 133.97 (s), 130.52 (s), 125.42 (s), 124.80 (s), 123.30 (s), 120.01 (s), 44.10 (s), 38.76 (s), 18.60 (s).  $^1\text{H}$  NMR (*S*-ABA·[Pt(ppy)Cl<sub>2</sub>], 400 MHz, DMSO-*d*<sub>6</sub>):  $\delta$  12.69 (s, 1H),  $\delta$  9.49 (d,  $J = 6.0$  Hz, 1H), 8.16 (td,  $J = 18.0, 15.7, 7.8$  Hz, 6H), 7.79 (d,  $J = 7.4$  Hz, 1H), 7.51 (s, 2H), 7.16 (p,  $J = 7.2$  Hz, 3H), 3.44 (h,  $J = 6.7$  Hz, 1H), 2.68 (dd,  $J = 16.7, 5.8$  Hz, 1H), 2.56 (m, 1H), 1.23 (d,  $J = 6.5$  Hz, 3H).  $^{13}\text{C}$  NMR (*S*-ABA·[Pt(ppy)Cl<sub>2</sub>], 101 MHz, DMSO-*d*<sub>6</sub>):  $\delta$  172.00 (s), 165.44(s), 149.73(s), 144.98(s), 142.07 (s), 140.70(s), 133.96 (s), 130.52 (s), 125.42 (s), 124.80 (s), 123.30 (s), 120.01 (s), 44.10 (s), 38.77 (s), 18.60 (s). Single crystals were prepared by slowly evaporating *R/S*-ABA·[Pt(ppy)Cl<sub>2</sub>] in methanol solution at room temperature.

### 2.3 Synthesis of *R/S*-MBA·Cl.

10 mL *R/S*-methylbenzylamine (*R/S*-MBA) was dropped into a 250 mL round bottom flask and then 20 mL HCl was slowly added into it using a constant pressure dropping funnel. Ice bath was employed to control the temperature, the solution was stirred for two days, and then evaporated at 80 °C for 1h to obtain the *R/S*-MBA·Cl precipitates. The obtained precipitates were further washed with diethyl ether and then dried under vacuum to obtain the white solid product. The yield is  $\approx 60\%$ , and the  $^1\text{H}$  NMR and  $^{13}\text{C}$  NMR spectra of *R/S*-MBA·Cl are shown in Figures S29 to S32.<sup>3</sup>  $^1\text{H}$  NMR (*R*-MBA·Cl, 400 MHz, DMSO-*d*<sub>6</sub>):  $\delta$  8.77 (s, 3H), 7.55 (d,  $J = 7.4$  Hz, 2H), 7.40 (dt,  $J = 22.6, 7.0$  Hz, 3H), 4.36 (d,  $J = 6.4$  Hz, 1H), 1.53 (d, 6.8 Hz, 3H).  $^{13}\text{C}$  NMR (*R*-MBA·Cl, 101 MHz, DMSO-*d*<sub>6</sub>):  $\delta$ =140.00 (s), 129.08 (s), 128.72 (s), 127.36 (s), 50.49 (s), 21.35.  $^1\text{H}$  NMR (*S*-MBA·Cl 400 MHz, DMSO-*d*<sub>6</sub>):  $\delta$ =8.79 (s, 3H), 7.55 (d,  $J = 7.4$  Hz, 2H), 7.40 (dt,  $J = 22.5, 6.9$  Hz, 3H), 4.34 (d,  $J = 5.8$  Hz, 1H), 1.53 (d,  $J = 6.6$  Hz, 3H).  $^{13}\text{C}$  NMR (*R*-MBA·Cl, 101 MHz, DMSO-*d*<sub>6</sub>):  $\delta$ =140.00 (s), 129.07 (s), 128.72 (s), 127.37 (s), 50.49 (s), 21.35 (s).

## 2.4 Synthesis of *R/S*-MBA·[Pt(ppy)Cl<sub>2</sub>].

A mixture of [Pt(ppy)( $\mu$ -Cl)]<sub>2</sub> (78.5 mg, 0.1 mmol) and *R/S*-MBACl (31.5 mg, 0.2 mmol) in chloroform (5 mL) was stirred at room temperature for two days. The reaction mixture was filtered and evaporated to get yellow solid. Yield, 108 mg (0.14 mmol, 98%); The <sup>1</sup>H NMR and <sup>13</sup>C NMR spectra of *R/S*-MBA·[Pt(ppy)Cl<sub>2</sub>] are shown in Figures S33 to S36. <sup>1</sup>H NMR (*R*-MBA·[Pt(ppy)Cl<sub>2</sub>], 400 MHz, DMSO-*d*<sub>6</sub>):  $\delta$  9.49 (d,  $J$  = 5.8 Hz, 1H), 8.45 (s, 3H), 8.30-8.18 (m, 1H), 8.18-8.09 (m, 2H), 7.79 (d,  $J$  = 7.4 Hz, 1H), 7.51 (d,  $J$  = 7.5 Hz, 3H), 7.41 (dt,  $J$  = 16.2, 7.3 Hz, 3H), 7.22-7.08 (m, 2H), 4.39 (s, 1H), 1.51 (d,  $J$  = 6.7 Hz, 3H). <sup>13</sup>C NMR (*R*-MBA·[Pt(ppy)Cl<sub>2</sub>], 101 MHz, DMSO-*d*<sub>6</sub>):  $\delta$  165.52 (s), 149.73 (s), 144.98 (s), 142.05 (s), 140.72 (s), 139.80 (s), 133.97 (s), 130.52 (s), 129.13 (s), 128.81 (s), 127.32 (s), 125.44 (s), 124.80 (s), 123.28 (s), 120.00 (s), 50.34 (s), 21.20 (s). <sup>1</sup>H NMR (*S*-MBA·[Pt(ppy)Cl<sub>2</sub>] 400 MHz, DMSO-*d*<sub>6</sub>):  $\delta$  9.49 (d,  $J$  = 5.3 Hz, 1H), 8.46 (s, 3H), 8.25-8.18 (m, 1H), 8.19-8.07 (m, 2H), 7.79 (d,  $J$  = 7.2 Hz, 1H), 7.51 (d,  $J$  = 7.3 Hz, 3H), 7.40 (dt,  $J$  = 23.6, 7.2 Hz, 3H), 7.24-7.07 (m, 2H), 4.40 (s, 1H), 1.51 (d,  $J$  = 6.6 Hz, 3H). <sup>13</sup>C NMR (*S*-MBA·[Pt(ppy)Cl<sub>2</sub>], 101 MHz, DMSO-*d*<sub>6</sub>):  $\delta$  165.53 (s), 149.73 (s), 144.99 (s), 142.06 (s), 140.72 (s), 139.78 (s), 133.98 (s), 130.53 (s), 129.14 (s), 128.83 (s), 127.31 (s), 125.44 (s), 124.80 (s), 123.29 (s), 120.01 (s), 50.31 (s), 21.18 (s). Single crystals were prepared by slowly evaporating *R/S*-MBA·[Pt(ppy)Cl<sub>2</sub>] in methanol solution at room temperature.

## 3 Characterization Methods

### 3.1 X-ray crystallographic analysis.

Single crystal X-ray diffraction (XRD) data were collected on a Rigaku XtalAB PRO MM007 DW diffractometer with a Cu-K $\alpha$  X-ray source (wavelength = 1.54178 Å). The structures were solved by direct method using Olex2 software.<sup>4</sup> The structures were drawn from CIFs by using Mercury software. Powder diffraction data were obtained on a powder diffractometer (Rigaku Smart Lab 3kW) equipped with a Cu-K $\alpha$  X-ray source.

### 3.2 Nuclear Magnetic Resonance Spectroscopy (NMR).

$^1\text{H}$  and  $^{13}\text{C}$  NMR spectra were obtained by Bruker AV400 Spectrometer at ambient temperature with  $\text{DMSO-}d_6$  or  $\text{CDCl}_3$  as solvent. Solid-state NMR experiment was carried out by the Bruker Avance III WB 400 NMR spectrometer. Spectra were obtained using a cross-polarization magic angle spinning experiment at 25 °C. The relaxation rates  $R_1$  were obtained by fitting the intensity of individual  $^{13}\text{C}$  resonances as a function of the inversion recovery time  $t$ .<sup>5</sup>

$$M(t) = M_0[1 - e^{(-t/T_1)}] \quad (\text{Equation S1})$$

$$R_1 = 1/T_1 \quad (\text{Equation S2})$$

where  $M(t)$  is the resonance at time  $t$ , and  $M_0$  is the resonance intensity at time  $t=0$ . The  $^{13}\text{C}$  spin-lattice relaxation times in the rotating frame,  $T_1$ , is determined by the least-squares fit using the experimental data.

### 3.3 Thermal gravimetric analysis.

TGA was carried out under a continuous flow of nitrogen gas on a TGA/DSC instrument (METTLER TOLEDO). The samples (~ 20 mg) were heated in aluminum crucibles at a temperature ramp rate of 10 °C min<sup>-1</sup>.

### 3.4 Photophysical properties.

UV/visible-diffuse-reflectance spectra were obtained by Cary 5000 UV-visible-NIR spectrophotometer. Steady-state Photoluminescence (PL) and time-resolved photoluminescence (TRPL) were measured by Spectrofluorometer FLS1000 with lamp and pulsed laser, respectively

### 3.5 CD and CPL spectra.

The measurements of Circular dichroism (CD) spectra were performed under ambient conditions on a JASCO J-1200 CD spectrometer. The samples for CD measurement were prepared though pressing the  $R/S\text{-MBA}\cdot[\text{Pt}(\text{ppy})\text{Cl}_2]$  and  $R/S\text{-ABA}\cdot[\text{Pt}(\text{ppy})\text{Cl}_2]$  powder and KBr powder ( $R/S\text{-MBA}\cdot[\text{Pt}(\text{ppy})\text{Cl}_2]$  or  $R/S\text{-ABA}\cdot[\text{Pt}(\text{ppy})\text{Cl}_2]:\text{KBr}=1:50$ , w:w) into a pellet. Circularly polarized photoluminescence (CPL) measurements were conducted on a JASCO CPL-3000 spectrometer. Spin-coated film was prepared on the REESEEN PvS-mini7 spin-coater. All samples for CPL measurement were excited around 360 nm. In the CPL

measurement, three scans for spin-coated PMMA film were accumulated. The PLQYs were measured using an Edinburgh FLS-1000 fluorescence spectrometer with SM4 integrating sphere.

### 3.6 PMMA films preparation.

Poly(methyl methacrylate) (PMMA, density  $d_{\text{PMMA}}=1.188 \text{ g cm}^{-3}$ , 100 mg) was dissolved in DCM (4 mL). 25mg of *R/S*-MBA·[Pt(ppy)Cl<sub>2</sub>] and *R/S*-ABA·[Pt(ppy)Cl<sub>2</sub>] were then mixed with PMMA solution (0.5 mL) for 30 min by ultra-sonication. For spin coating glass slides were washed with acetone, and then 100  $\mu\text{L}$  of the sample that is PMMA mixture in DCM was spin coated at 2500 rpm for 30 s to get the film.

## 4 Theoretical calculations

The Vienna Ab-initio Simulation Package (VASP) software is used to accomplish the DFT calculations.<sup>6, 7</sup> The projector augmented wave (PAW)<sup>8</sup> method with the Perdew-Burke-Ernzerhof (PBE) functional revised for solids (PBEsol)<sup>9</sup> is selected and the plane-wave cutoff energy is set to 520.0 eV. Geometric structures are fully relaxed until the energy and total forces are converged to  $10^{-5}$  eV and  $0.001 \text{ eV/\AA}$ , respectively.  $\Gamma$ -centered Monkhorst-Pack mesh k points with k-spacing of  $0.04 \pi \text{ \AA}^{-1}$  are employed for sampling the Brillouin. DFT-D3 method with Becke-Johnson damping (BJ)<sup>10</sup> is applied for van der Waals correction. For the band structure calculation, 20 points are inserted between each pair of high symmetry k points. The VASPKIT codes<sup>11</sup> are used for post-processing analysis.

Density functional theory (DFT)<sup>12</sup> and unrestricted DFT methods were employed to obtain the equilibrium geometries and the vibration frequencies of ground and the lowest triplet excited states within the Gaussian 16 package.<sup>13</sup> The structural optimizations were carried out with the quantum mechanics/molecular mechanics (QM/MM) method in the ONIOM model<sup>14</sup> which were constructed according to the X-ray crystal structures (the detail packing structure of  $3 \times 3 \times 2$  supercells shown in Figure S1). In the QM/MM calculation, one innermost molecule was treated as a high-layer by an accurate high-level quantum mechanics method and the surrounding molecules were treated as a low-layer by the efficient universal force field (UFF) with charge

equilibrium method, and the QM part was allowed to move while those in the MM part was frozen. The LANL2DZ<sup>15</sup> basis set was applied for the Pt atom, and the 6-311G(d,p) basis set was applied for the others C/N/H/O/Cl atoms within the PBE0-GD3BJ method.<sup>16, 17</sup> The absorption and circular dichroism spectra as well as the transition electronic/magnetic dipole moment are calculated by the time-dependent DFT method based on the optimized S0 geometry, and the simulated circular dichroism spectra red-shifted about 108 nm to match well with the experimental spectra. The structural reorganization energy between ground and excited states is obtained via MOMAP program.<sup>18</sup>

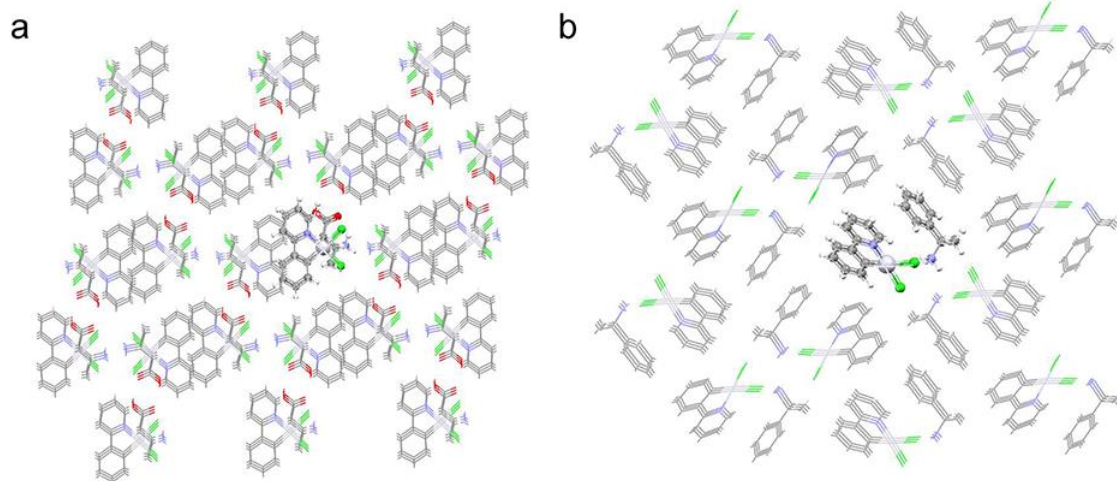

**Figure S1.** ONIOM model diagrams for (a) *R*-ABA·[Pt(ppy)Cl<sub>2</sub>] and (b) *R*-MBA·[Pt(ppy)Cl<sub>2</sub>].

## II Supplementary Discussion

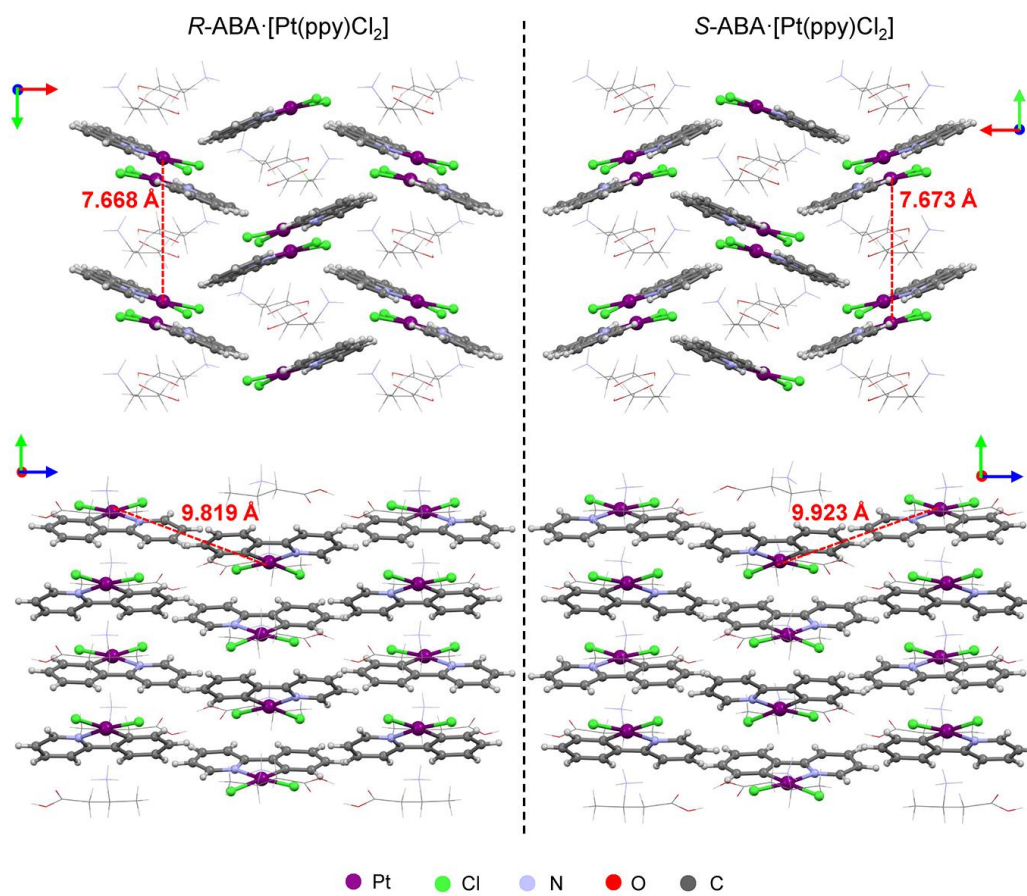

**Figure S2.** Crystalline structures of *R/S*-ABA·[Pt(ppy)Cl<sub>2</sub>].



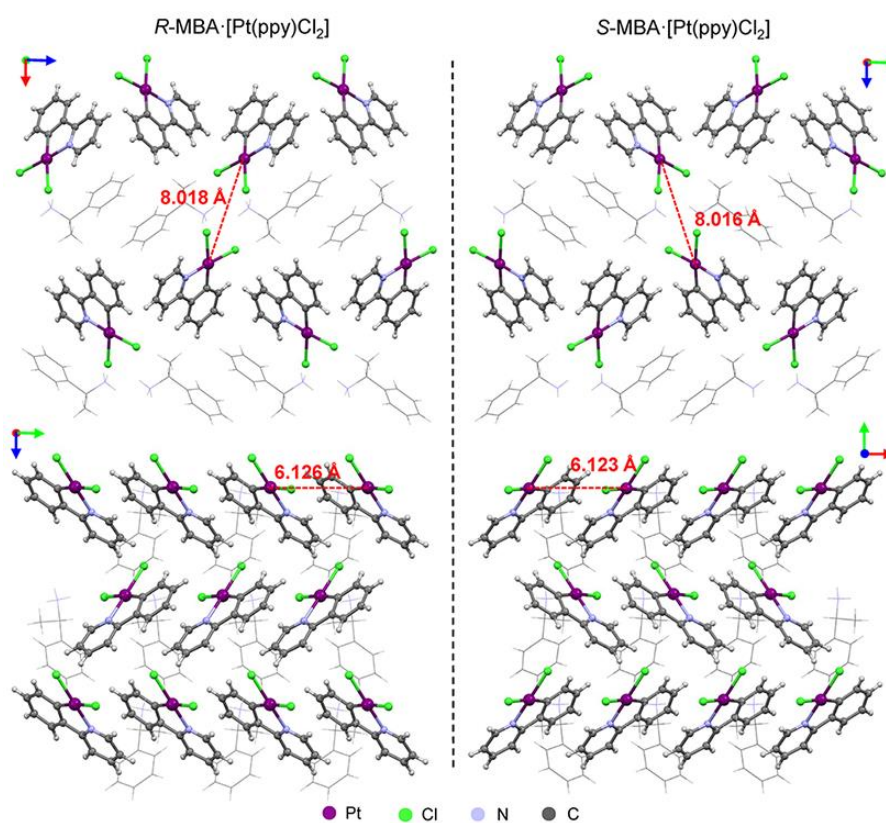

**Figure S3.** Crystalline structures of  $R/S$ -MBA·[Pt(ppy)Cl<sub>2</sub>].

a

```

ADDSYM Search on ALL NON-H Chemical Types (Max NonFLL 20 Perc)
Criteria 1.00 Deg (Metric), 0.25 Ang (Rot), 0.45 Ang (Inv), 0.45 Ang (Transl)
Symm. Input Reduced (Ang) (Deg) Perc AvrDev. (Ang) Input Cell
Elem Cell_Row Cell_Row d Typ Dot Angle Fll MaxDev. x y z
n * [ 0 1 0] [ 1 0 0] 7.67 2 1 0 86 0.110 Through 0 0.512 0
COO5 -C009 0.248 Glide 1/2 0 1/2
-1 * =====
C11 -C009 0.279 at 1/4 0.262 1/4

Reduced-to-Convent Input-to-Reduced T = Input-to-Convent: a' = T a
( 0 1 0 ) ( 0 -1 0 ) ( 1 0 0 ) Del(T)
( -1 0 0 ) X ( 1 0 0 ) = ( 0 1 0 ) =
( 0 0 1 ) ( 0 0 1 ) ( 1 0 0 ) 1.000

Cell Lattice a b c Alpha Beta Gamma Volume CrystalSystem Lave
Input mP 13.749 7.668 16.921 90.00 103.63 90.00 1734 monoclinic 2/m
Reduced P 7.668 13.749 16.921 103.63 90.00 90.00 1734
Convent mP 13.749 7.668 16.921 90.00 103.63 90.00 1734 monoclinic 2/m
:: Origin Shifted to: 0.250, 0.262, 0.250
Missed/Additional Symmetry (Ignore NonFll): Suggested SPGA = P21/n (No 14)
*** PLEASE COMPARE with 'CALC ADDSYM EXACT'

```

b

```

ADDSYM Search on ALL NON-H Chemical Types (Max NonFLL 20 Perc)
Criteria 1.00 Deg (Metric), 0.25 Ang (Rot), 0.45 Ang (Inv), 0.45 Ang (Transl)
Symm. Input Reduced (Ang) (Deg) Perc AvrDev. (Ang) Input Cell
Elem Cell_Row Cell_Row d Typ Dot Angle Fll MaxDev. x y z
n * [ 0 1 0] [ 1 0 0] 7.67 2 1 0 100 0.097 Through 0 0.755 0
COOK -C009 0.188 Glide 1/2 0 1/2
-1 * =====
COOX -C009 0.188 at 1/4 0.005 1/4

Reduced-to-Convent Input-to-Reduced T = Input-to-Convent: a' = T a
( 0 1 0 ) ( 0 -1 0 ) ( 1 0 0 ) Del(T)
( -1 0 0 ) X ( 1 0 0 ) = ( 0 1 0 ) =
( 0 0 1 ) ( 0 0 1 ) ( 1 0 0 ) 1.000

Cell Lattice a b c Alpha Beta Gamma Volume CrystalSystem Lave
Input mP 13.738 7.673 16.917 90.00 103.62 90.00 1733 monoclinic 2/m
Reduced P 7.673 13.738 16.917 103.62 90.00 90.00 1733
Convent mP 13.738 7.673 16.917 90.00 103.62 90.00 1733 monoclinic 2/m
:: Origin Shifted to: 0.250, 0.005, 0.250
Missed/Additional Symmetry : Suggested SPGA = P21/n (No 14)

```

**Figure S4.** Post-refinement analyses for missing symmetry using PLATON's ADDSYM tool on isolated  $[\text{Pt}(\text{ppy})\text{Cl}_2]^-$  frameworks in (a)  $R\text{-ABA}\cdot[\text{Pt}(\text{ppy})\text{Cl}_2]$  and (b)  $S\text{-ABA}\cdot[\text{Pt}(\text{ppy})\text{Cl}_2]$ .  $\text{ABA}^+$  were manually deleted from the fully refined structure using the Olex2 software. The remaining  $[\text{Pt}(\text{ppy})\text{Cl}_2]^-$  framework is exported into a CIF file for PLATON symmetry analysis. The results indicate a shift from a chiral space group  $P2_1$  to an achiral space group.

a

```

ADDSYM Search on ALL NON-H Chemical Types (Max NonFLT 20 Perc)
Criteria 1.00 Deg (Metric), 0.25 Ang (Rot), 0.45 Ang (Invl), 0.45 Ang (Transl)
Symm. Input Reduced (Ang) (Deg) Perc AvrDev. (Ang) Input Cell
Elem Cell_Row Cell_Row d Typ Dot Angle Flt MaxDev. x y z
2 [ 0 1 0] [ 1 0 0] 6.13 2 1 0 100 0 Through 1/2 0 3/4
1 0 Screw 0 1/2 0
2 [ 0 0 1] [ 0 -1 0] 13.25 2 1 0 100 0 Through 3/4 1/2 0
1 0 Screw 0 0 1/2
2 [ 1 0 0] [ 0 0 1] 23.27 2 1 0 100 0 Through 0 3/4 1/2
1 0 Screw 1/2 0 0

Reduced-to-Convent      Input-to-Reduced      T = Input-to-Convent:      a' = T a
( 1 0 0 | ( 0 -1 0 | ( 0 -1 0 | Del(T)
( 0 1 0 | X ( 0 0 1 | = ( 0 0 1 | =
( 0 0 1 | ( -1 0 0 | ( -1 0 0 | 1.000

Cell Lattice a b c Alpha Beta Gamma Volume CrystalSystem Lave
Input aP 23.267 6.126 13.247 90.00 90.00 90.00 1888 orthorhombic mmm
Reduced P 6.126 13.247 23.267 90.00 90.00 90.00 1888
Convent aP 6.126 13.247 23.267 90.00 90.00 90.00 1888 orthorhombic mmm
:: Origin Shifted to: -0.500, 0.000, -0.500 after Cell Transformation
:: SpaceGroup = P212121 - No Obvious Spacegroup Change Needed/Suggested

```

b

```

ADDSYM Search on ALL NON-H Chemical Types (Max NonFLT 20 Perc)
Criteria 1.00 Deg (Metric), 0.25 Ang (Rot), 0.45 Ang (Invl), 0.45 Ang (Transl)
Symm. Input Reduced (Ang) (Deg) Perc AvrDev. (Ang) Input Cell
Elem Cell_Row Cell_Row d Typ Dot Angle Flt MaxDev. x y z
2 [ 1 0 0] [ 1 0 0] 6.12 2 1 0 100 0 Through 0 1/4 1/2
1 0 Screw 1/2 0 0
2 [ 0 1 0] [ 0 -1 0] 13.26 2 1 0 100 0 Through 1/2 0 3/4
1 0 Screw 0 1/2 0
2 [ 0 0 1] [ 0 0 1] 23.26 2 1 0 100 0 Through 3/4 1/2 0
1 0 Screw 0 0 1/2

Reduced-to-Convent      Input-to-Reduced      T = Input-to-Convent:      a' = T a
( 1 0 0 | ( 1 0 0 | ( 1 0 0 | Del(T)
( 0 -1 0 | X ( 0 -1 0 | = ( 0 1 0 | =
( 0 0 -1 | ( 0 0 -1 | ( 0 0 1 | 1.000

Cell Lattice a b c Alpha Beta Gamma Volume CrystalSystem Lave
Input aP 6.123 13.255 23.260 90.00 90.00 90.00 1888 orthorhombic mmm
Reduced P 6.123 13.255 23.260 90.00 90.00 90.00 1888
Convent aP 6.123 13.255 23.260 90.00 90.00 90.00 1888 orthorhombic mmm
:: Origin Shifted to: 0.500, 0.500, 0.500 after Cell Transformation
:: SpaceGroup = P212121 - No Obvious Spacegroup Change Needed/Suggested

```

**Figure S5.** Post-refinement analyses for missing symmetry using PLATON's ADDSYM tool on isolated  $[\text{Pt}(\text{ppy})\text{Cl}_2]^-$  frameworks in (a) *R*-MBA· $[\text{Pt}(\text{ppy})\text{Cl}_2]$  and (b) *S*-MBA· $[\text{Pt}(\text{ppy})\text{Cl}_2]$ . MBA<sup>+</sup> was manually deleted from the fully refined structure using the Olex2 software. The remaining  $[\text{Pt}(\text{ppy})\text{Cl}_2]^-$  framework is exported into a CIF file for PLATON symmetry analysis. There is no change from the original  $P2_12_12_1$  space group.

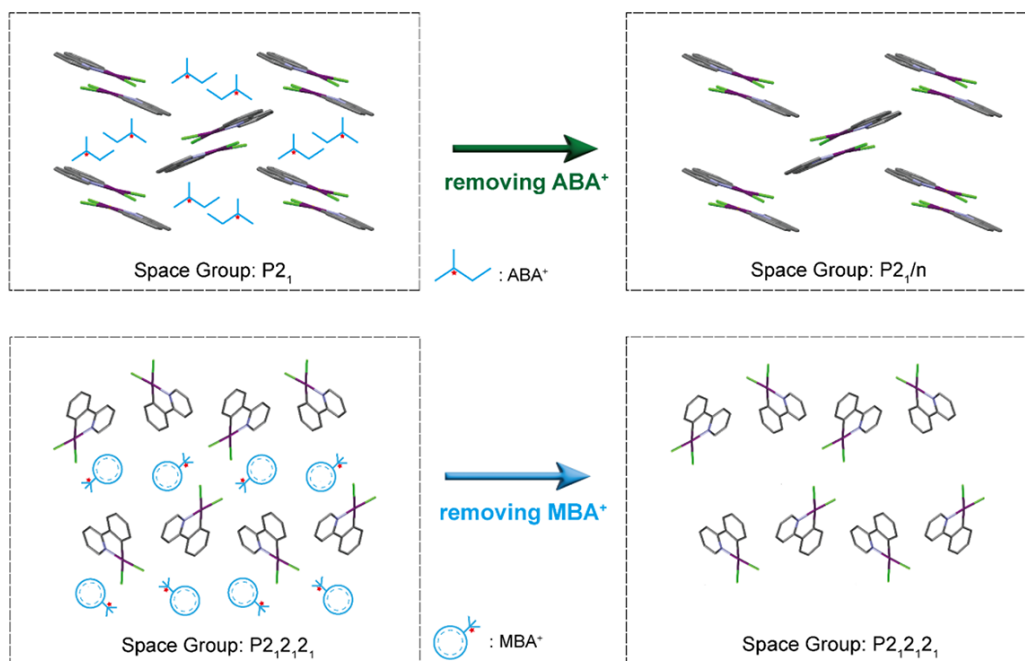

**Figure S6.** The structure diagrams of  $R\text{-ABA}\cdot[\text{Pt}(\text{ppy})\text{Cl}_2]$  (top) and  $R\text{-MBA}\cdot[\text{Pt}(\text{ppy})\text{Cl}_2]$  (bottom) without organic cations.

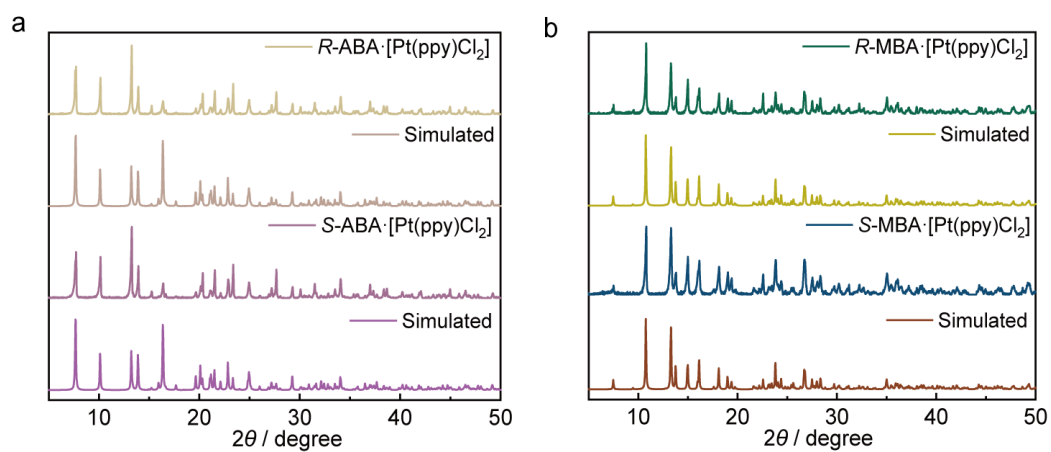

**Figure S7.** The simulated and experimental powder X-ray diffraction (PXRD) patterns of  $R/S\text{-ABA}\cdot[\text{Pt}(\text{ppy})\text{Cl}_2]$  and  $R/S\text{-MBA}\cdot[\text{Pt}(\text{ppy})\text{Cl}_2]$ .

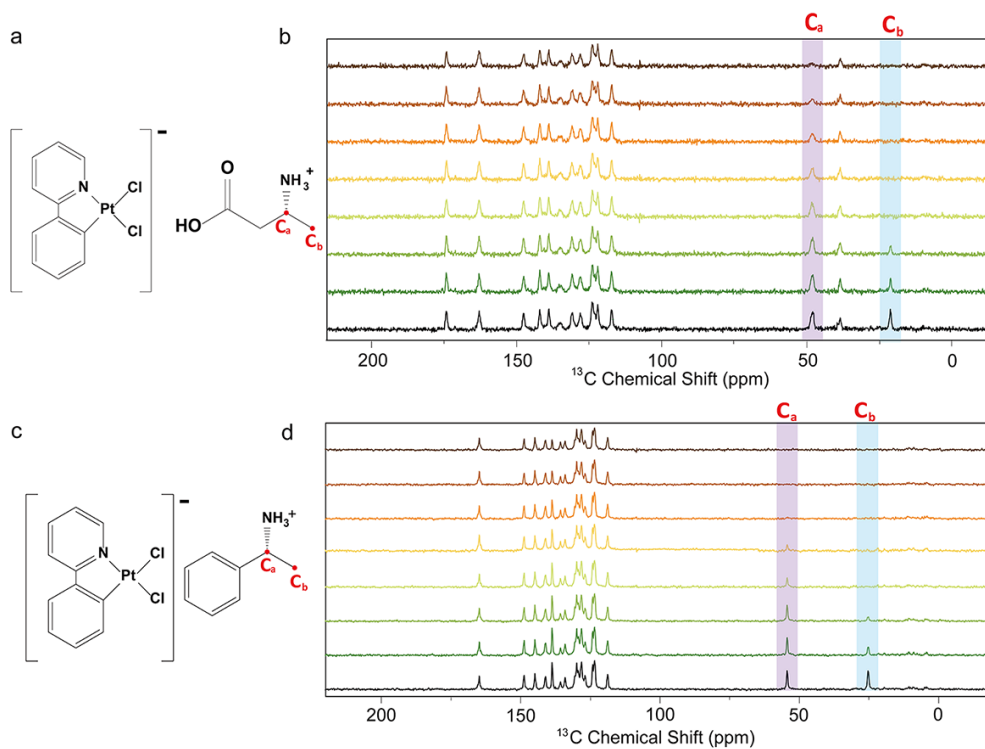

**Figure S8.**  $^{13}\text{C}$  CP-MAS spin-lattice relaxation results of (a, b) *R*-ABA·[Pt(ppy)Cl<sub>2</sub>] and (c, d) *R*-MBA·[Pt(ppy)Cl<sub>2</sub>] samples.

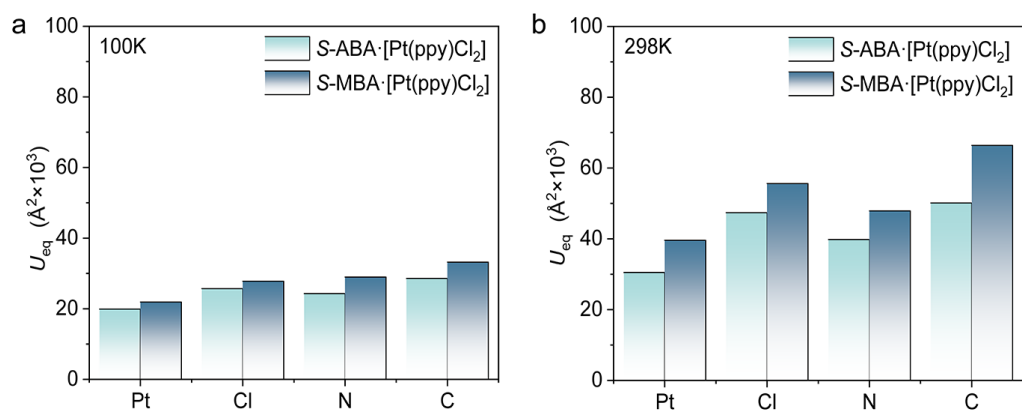

**Figure S9.** Atomic displacement of Pt, Cl, N and C of *R/S*-ABA·[Pt(ppy)Cl<sub>2</sub>] and *R/S*-ABA·[Pt(ppy)Cl<sub>2</sub>] at 100 K, respectively.

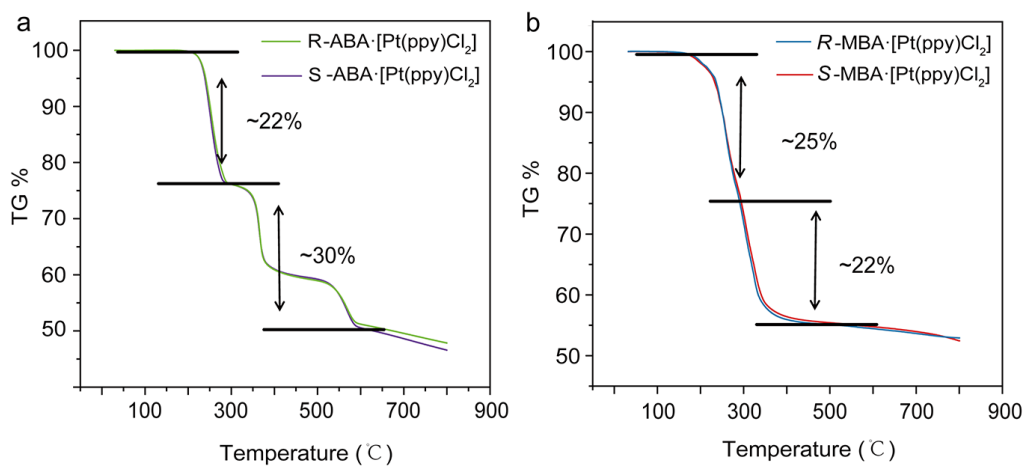

**Figure S10.** Thermogravimetric analysis curves of (a) *R/S*-ABA·[Pt(ppy)Cl<sub>2</sub>] and (b) *R/S*-MBA·[Pt(ppy)Cl<sub>2</sub>].



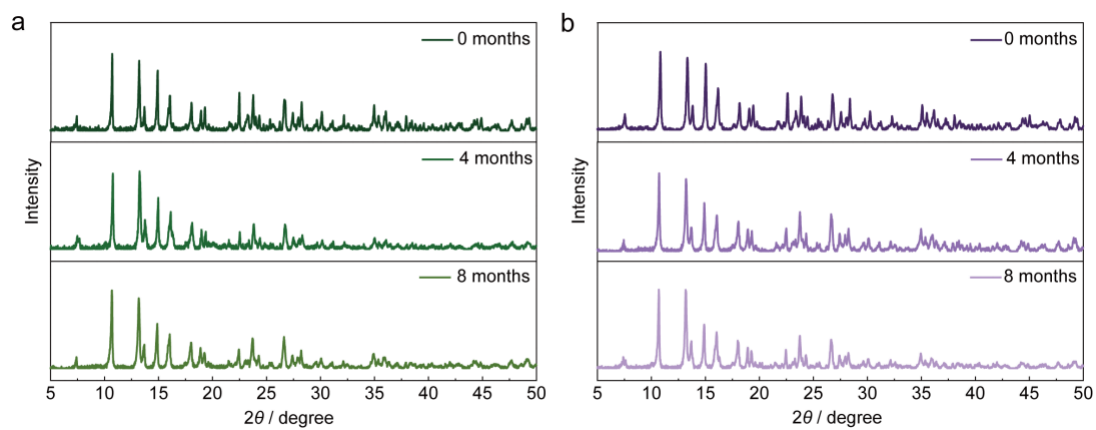

**Figure S11.** Stability of *R/S*-ABA·[Pt(ppy)Cl<sub>2</sub>]. The powder XRD results of (a) *R*-ABA·[Pt(ppy)Cl<sub>2</sub>] and (b) *S*-ABA·[Pt(ppy)Cl<sub>2</sub>] for as prepared and for the samples kept for 4 and 8 months, respectively.

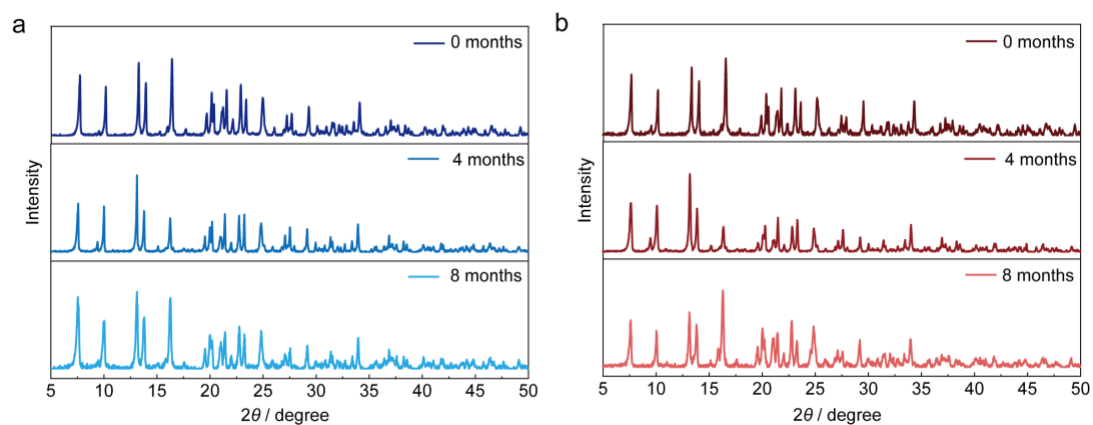

**Figure S12.** Stability of  $R/S$ -MBA·[Pt(ppy)Cl<sub>2</sub>]. The powder XRD results of (a)  $R$ -MBA·[Pt(ppy)Cl<sub>2</sub>] and (b)  $S$ -MBA·[Pt(ppy)Cl<sub>2</sub>] for as prepared and for the samples kept for 4 and 8 months, respectively.

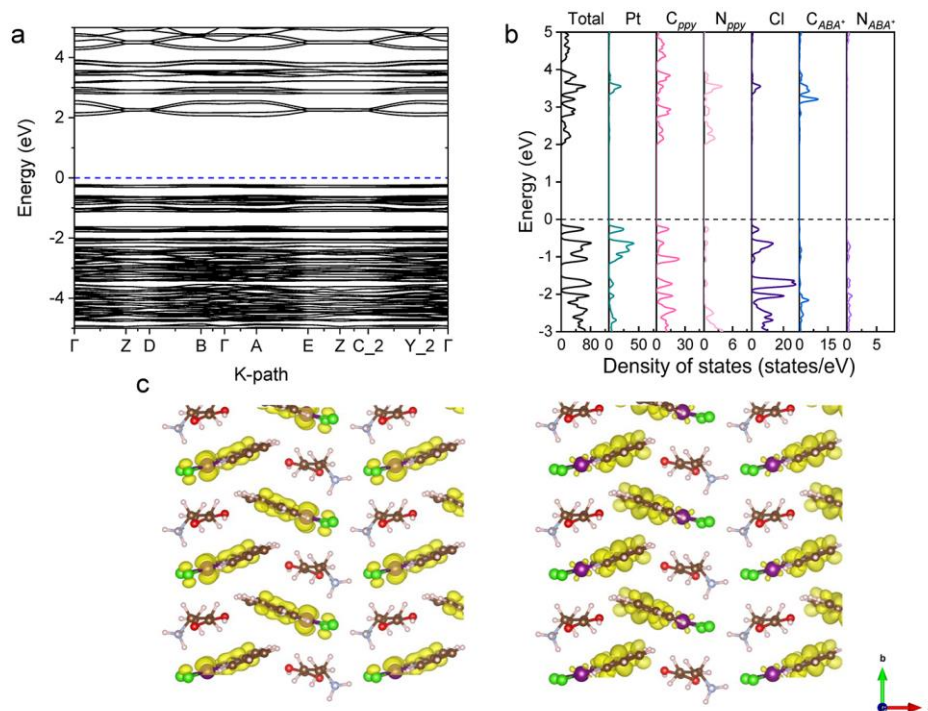

**Figure S13.** (a) Calculated electronic band structure of  $R\text{-ABA}\cdot[\text{Pt}(\text{ppy})\text{Cl}_2]$ . (b) Total and partial DOS for  $R\text{-ABA}\cdot[\text{Pt}(\text{ppy})\text{Cl}_2]$ . (c) Isosurface plots for the wave functions of VBM (below left) and CBM (below right) for  $R\text{-ABA}\cdot[\text{Pt}(\text{ppy})\text{Cl}_2]$ .

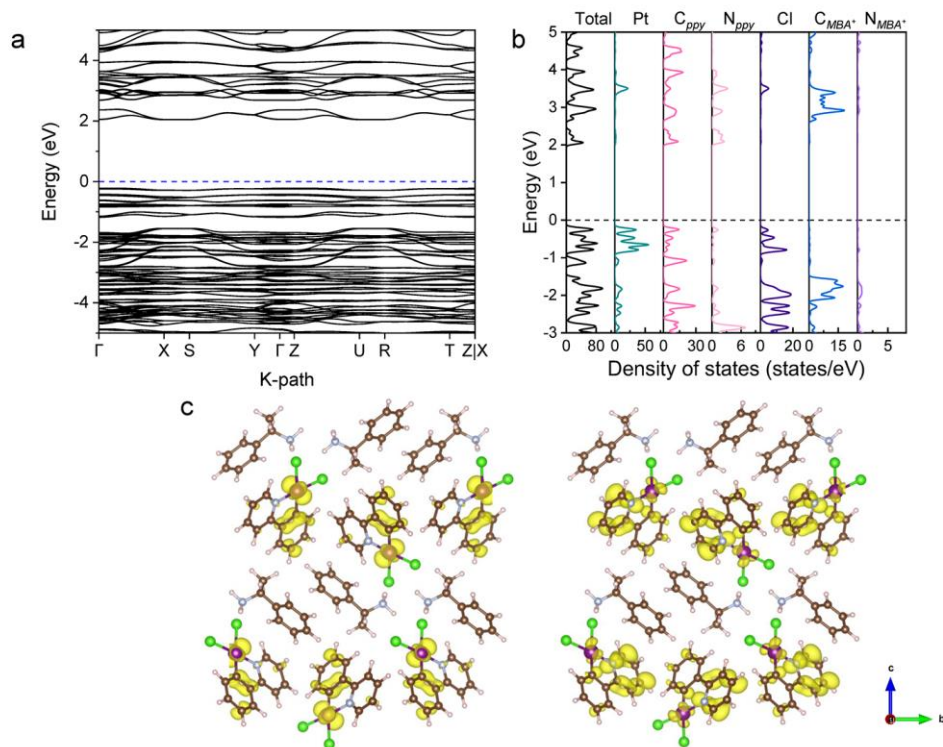

**Figure S14.** (a) Calculated electronic band structure of  $R\text{-MBA}\cdot[\text{Pt}(\text{ppy})\text{Cl}_2]$ . (b) Total and partial DOS for  $R\text{-MBA}\cdot[\text{Pt}(\text{ppy})\text{Cl}_2]$ . (c) Isosurface plots for the wave functions of VBM (below left) and CBM (below right) for  $R\text{-MBA}\cdot[\text{Pt}(\text{ppy})\text{Cl}_2]$ .

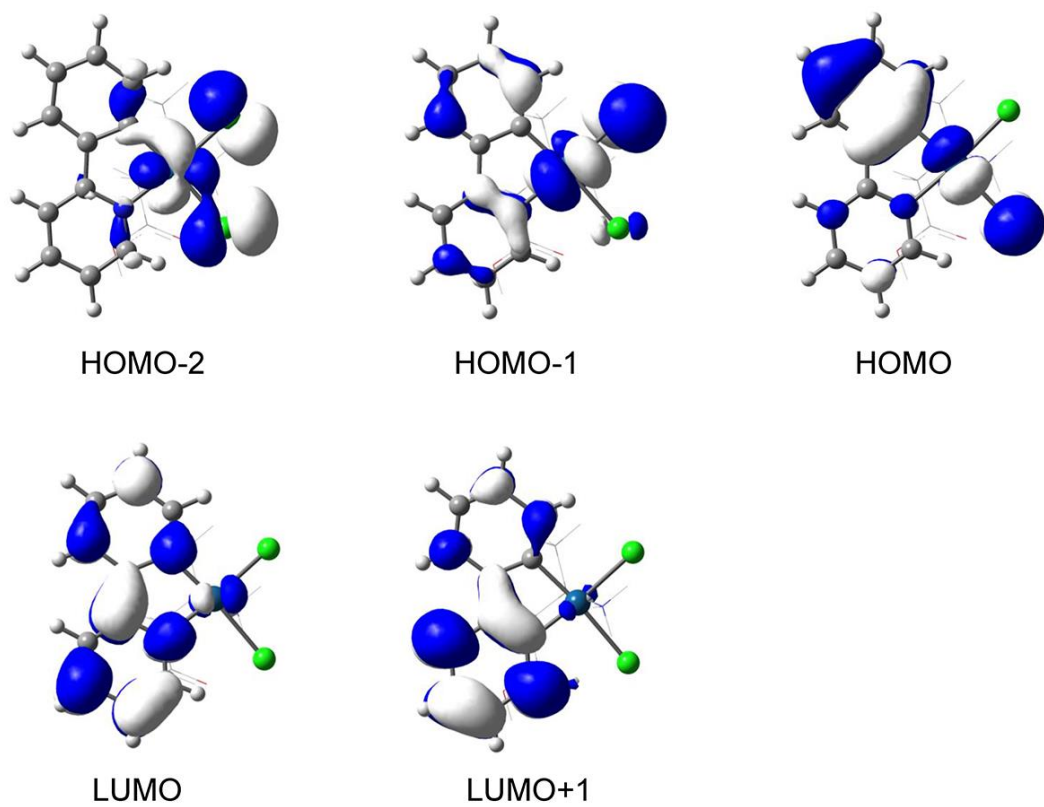

**Figure S15.** Molecular orbital distributions of  $R\text{-ABA}\cdot[\text{Pt}(\text{ppy})\text{Cl}_2]$  at ground state.

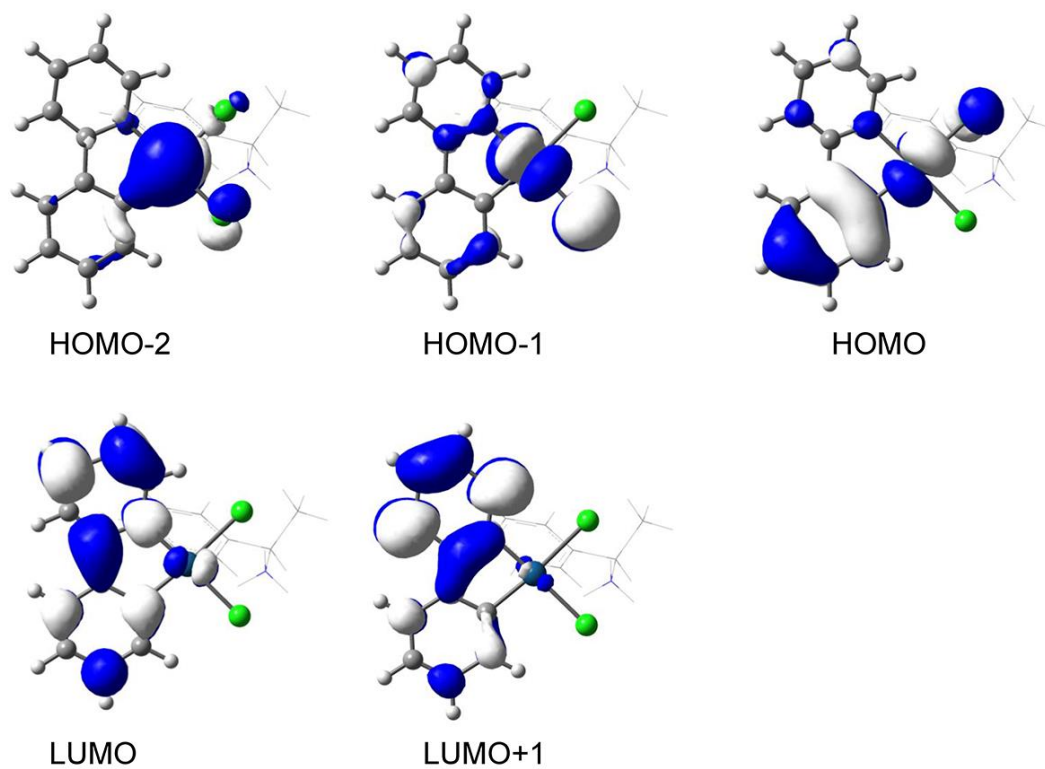

**Figure S16.** Molecular orbital distributions of  $R\text{-MBA}\cdot[\text{Pt}(\text{ppy})\text{Cl}_2]$  at ground state.

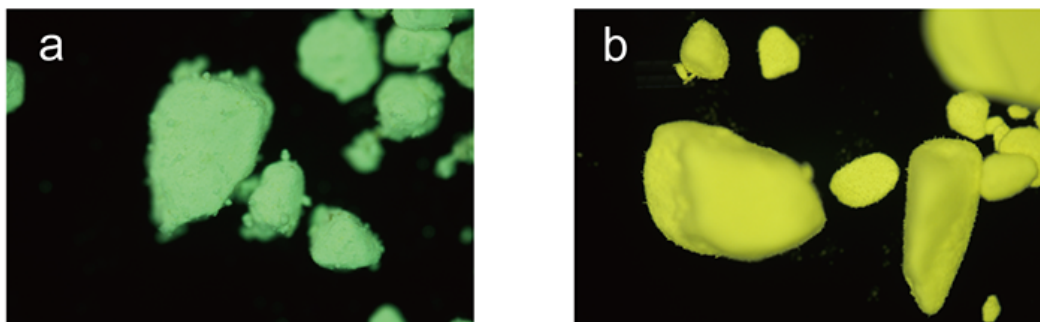

**Figure S17.** The photographs of (a)  $R\text{-ABA}\cdot[\text{Pt}(\text{ppy})\text{Cl}_2]$  and (b)  $R\text{-MBA}\cdot[\text{Pt}(\text{ppy})\text{Cl}_2]$  powders under 365 nm light illumination.

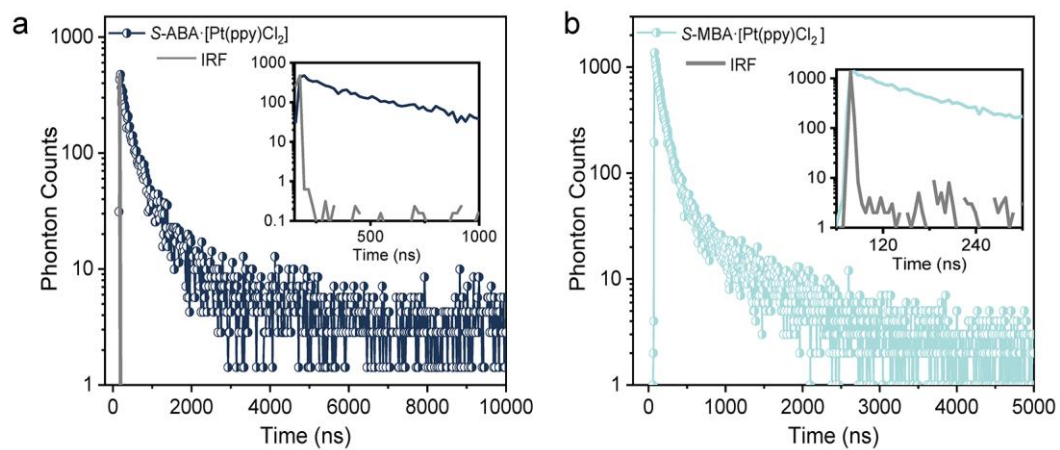

**Figure S18.** Photoluminescence decay spectra for (a) *S*-ABA·[Pt(ppy)Cl<sub>2</sub>] and (b) *S*-MBA·[Pt(ppy)Cl<sub>2</sub>] at room temperature.



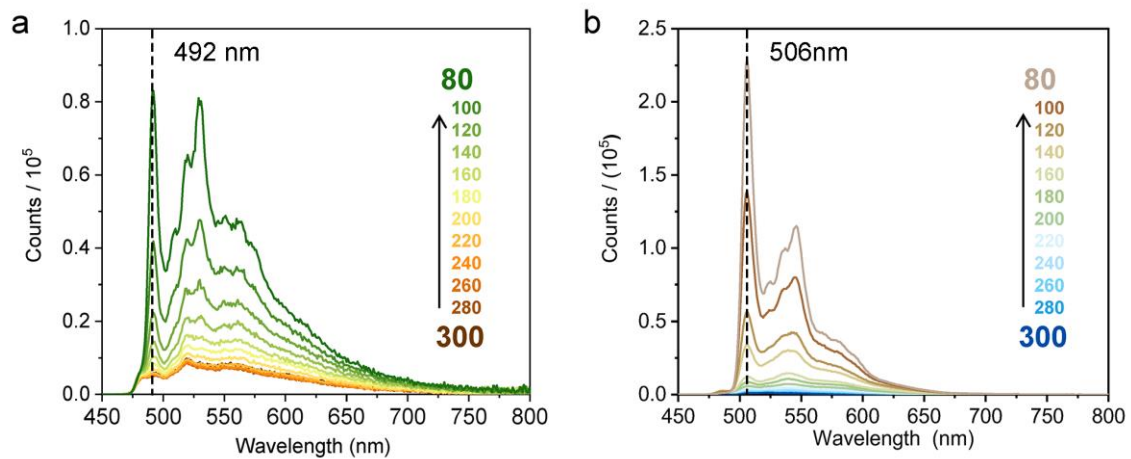

**Figure S19.** Emission spectra of *R*-ABA·[Pt(ppy)Cl<sub>2</sub>] (a) and *R*-MBA·[Pt(ppy)Cl<sub>2</sub>] (b) at various temperatures (from 300 K to 80 K).

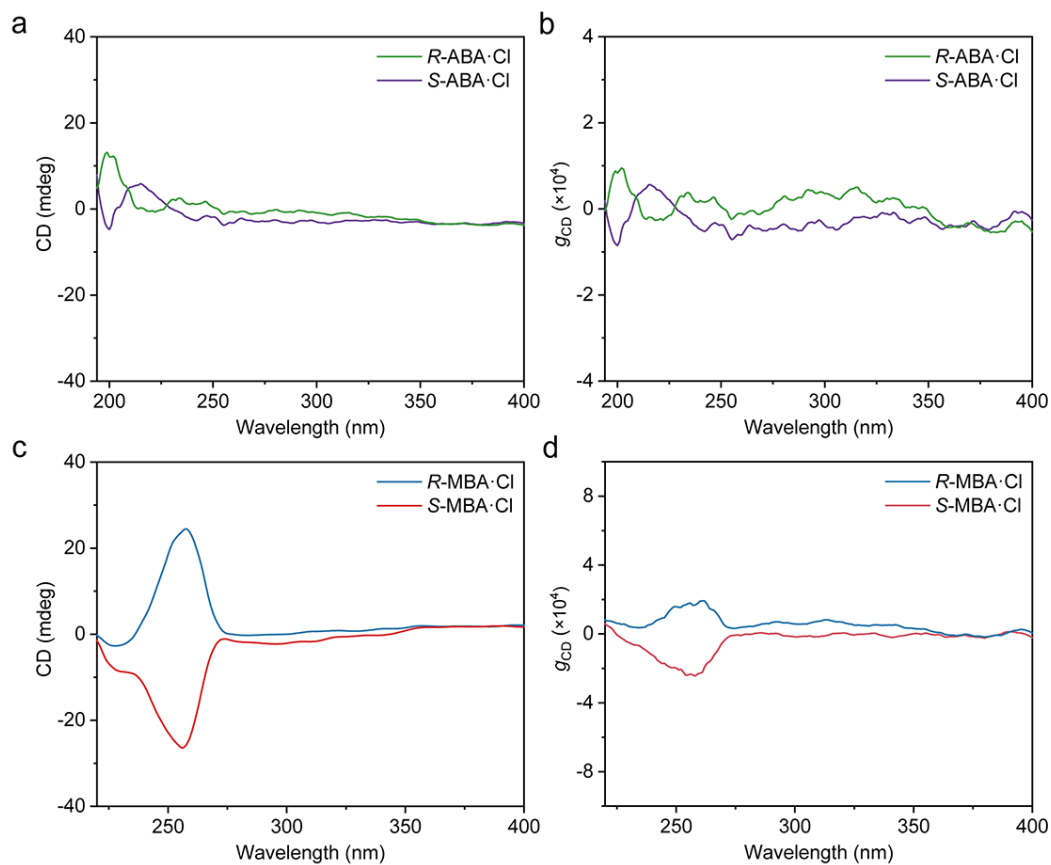

**Figure S20.** Measured CD spectra and absorption asymmetric factors ( $g_{\text{abs}}$ ) of *R/S*-ABA·Cl and *R/S*-MBA·Cl in chloroform solution.

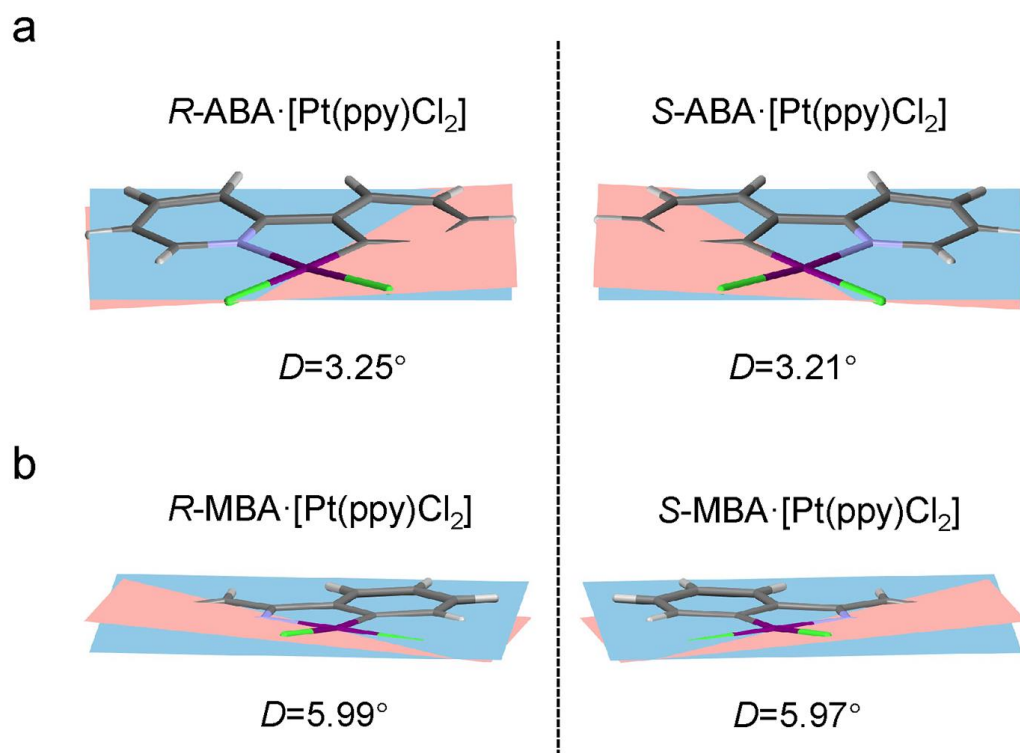

**Figure S21.** The dihedral angle (*D*) illustrations of the chiral cation-induced structural deformation of [Pt(ppy)Cl<sub>2</sub>]<sup>-</sup> for *R/S*-ABA·[Pt(ppy)Cl<sub>2</sub>]<sup>-</sup> at single crystals.

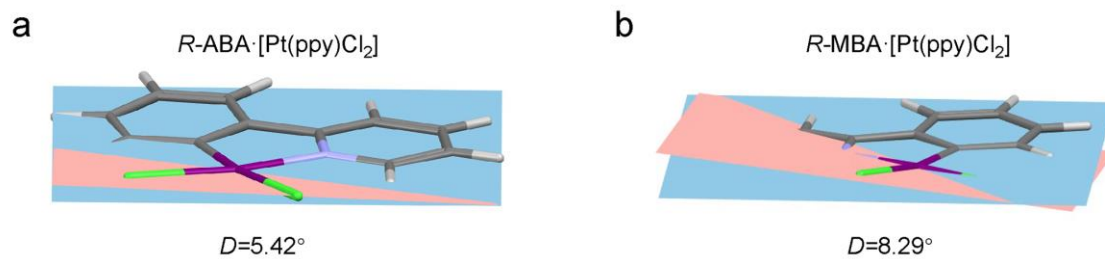

**Figure S22.** The dihedral angle ( $D$ ) illustrations of the chiral cation-induced structural deformation of  $[\text{Pt}(\text{ppy})\text{Cl}_2]^-$  for  $R\text{-ABA}\cdot[\text{Pt}(\text{ppy})\text{Cl}_2]$  at ground state.

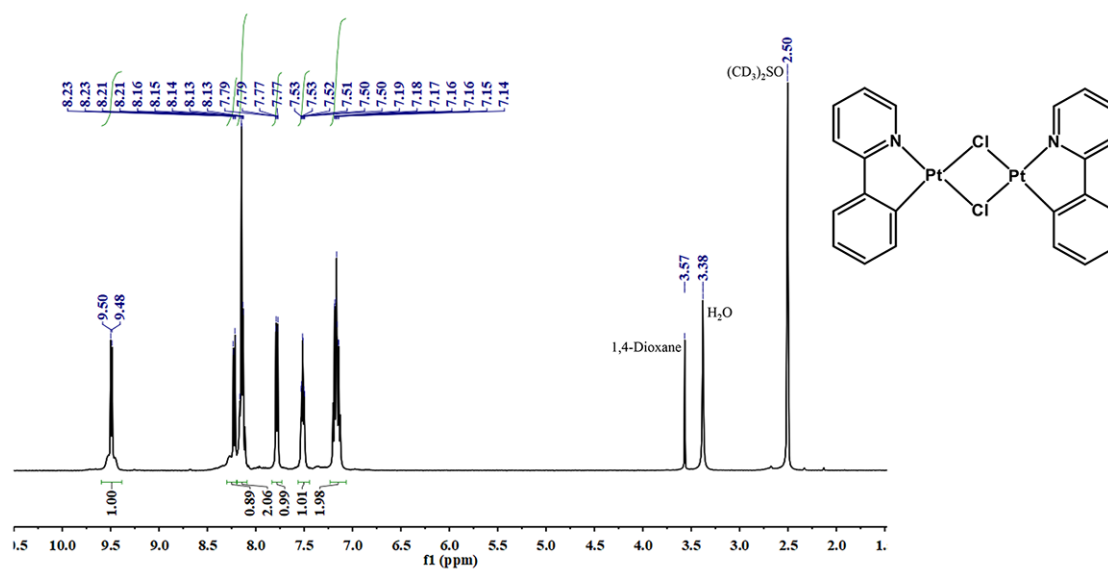

**Figure S23.**  $^1\text{H}$  NMR spectra of  $[\text{Pt}(\text{ppy})(\mu\text{-Cl})_2]$  in  $\text{DMSO-}d_6$ .

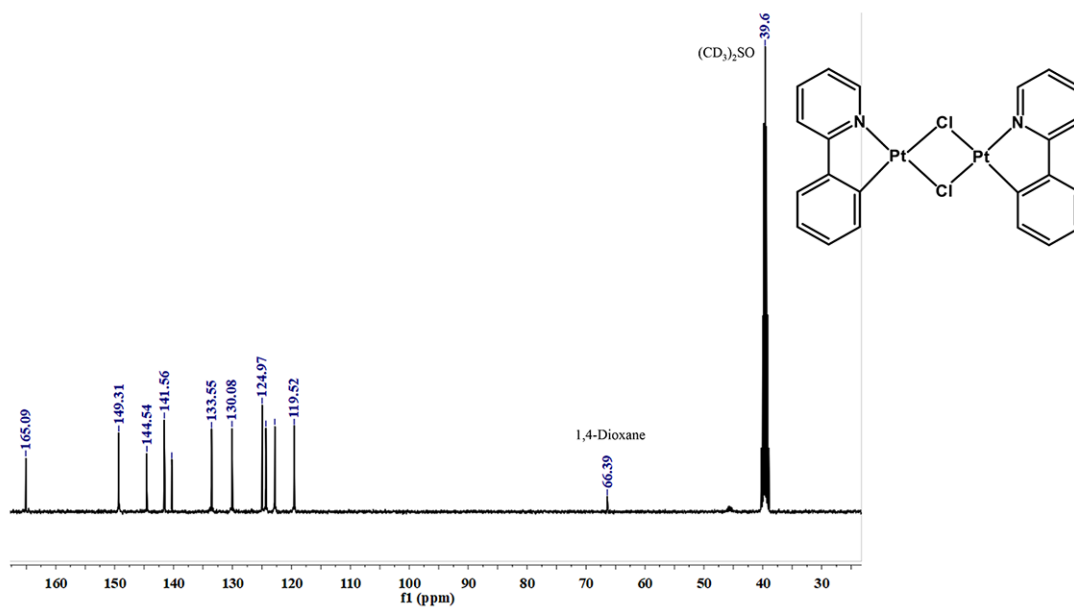

**Figure S24.**  $^{13}\text{C}$  NMR spectra of  $[\text{Pt}(\text{ppy})(\mu\text{-Cl})_2]$  in  $\text{DMSO-}d_6$ .

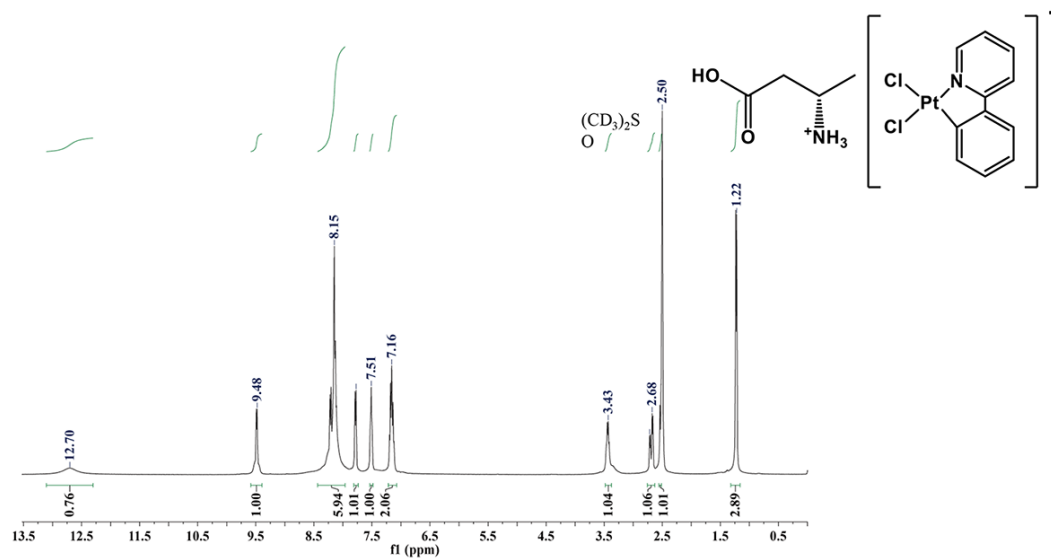

**Figure S25.**  $^1\text{H}$  NMR spectra of  $R\text{-ABA}\cdot[\text{Pt}(\text{ppy})\text{Cl}_2]$  in  $\text{DMSO-}d_6$ .

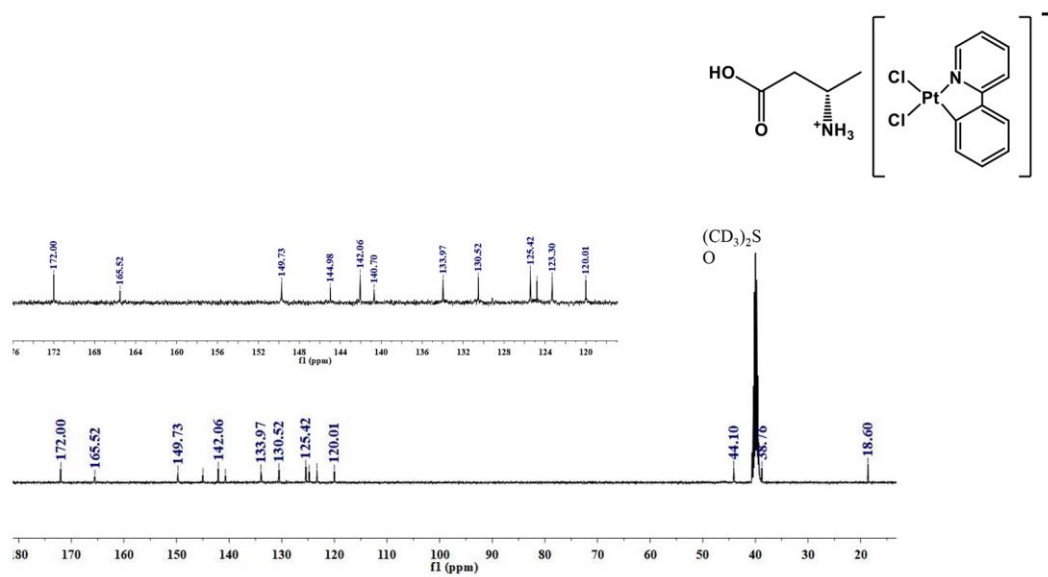

**Figure S26.**  $^{13}\text{C}$  NMR spectra of  $R\text{-ABA}\cdot[\text{Pt}(\text{ppy})\text{Cl}_2]$  in  $\text{DMSO-}d_6$ .



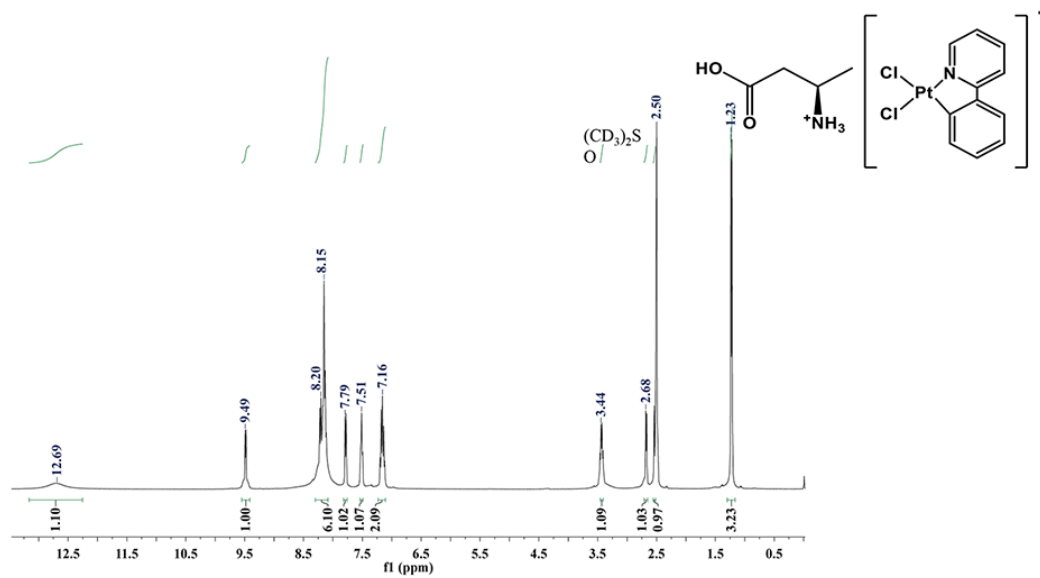

**Figure S27.**  $^1\text{H}$  NMR spectra of  $S\text{-ABA}\cdot[\text{Pt}(\text{ppy})\text{Cl}_2]$  in  $\text{DMSO-}d_6$ .

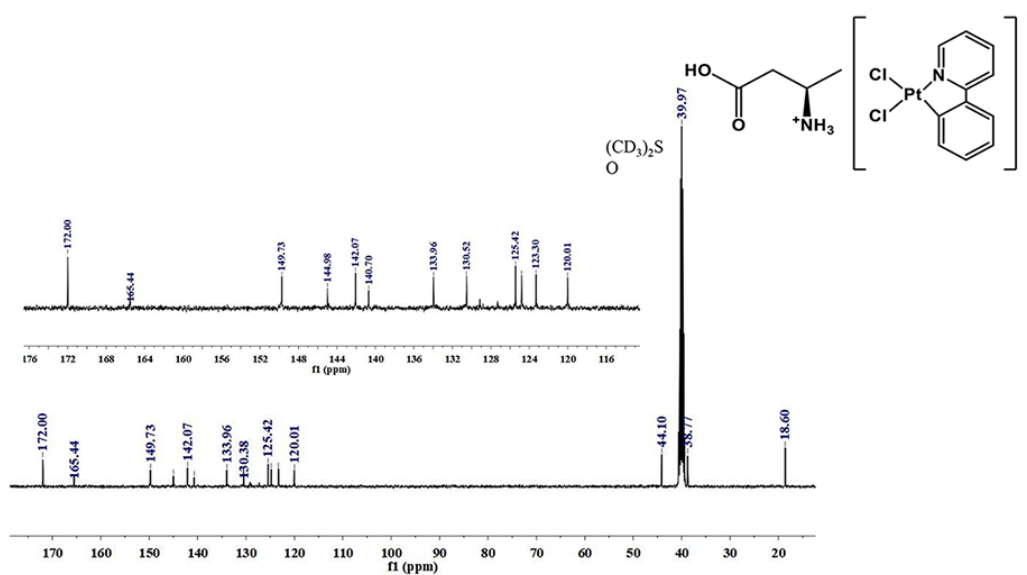

**Figure S28.**  $^{13}\text{C}$  NMR spectra of  $S\text{-ABA}\cdot[\text{Pt}(\text{ppy})\text{Cl}_2]$  in  $\text{DMSO-}d_6$ .

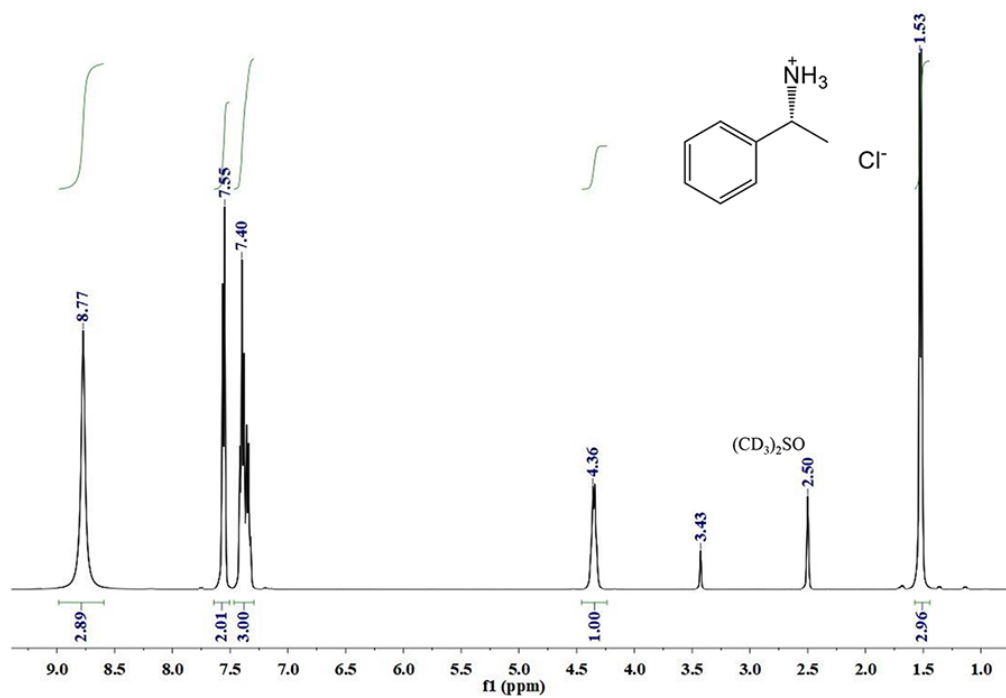

**Figure S29.**  $^1\text{H}$  NMR spectra of *R*-MBACl in  $\text{DMSO-}d_6$ .

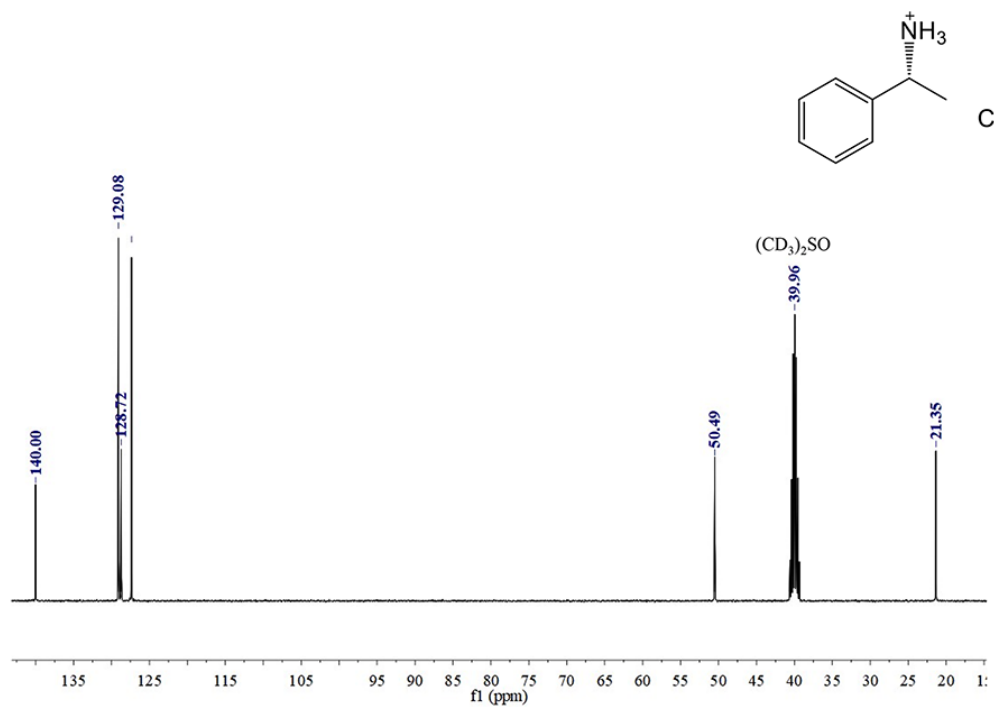

**Figure S30.**  $^{13}\text{C}$  NMR spectra of *R*-MBACl in  $\text{DMSO-}d_6$ .

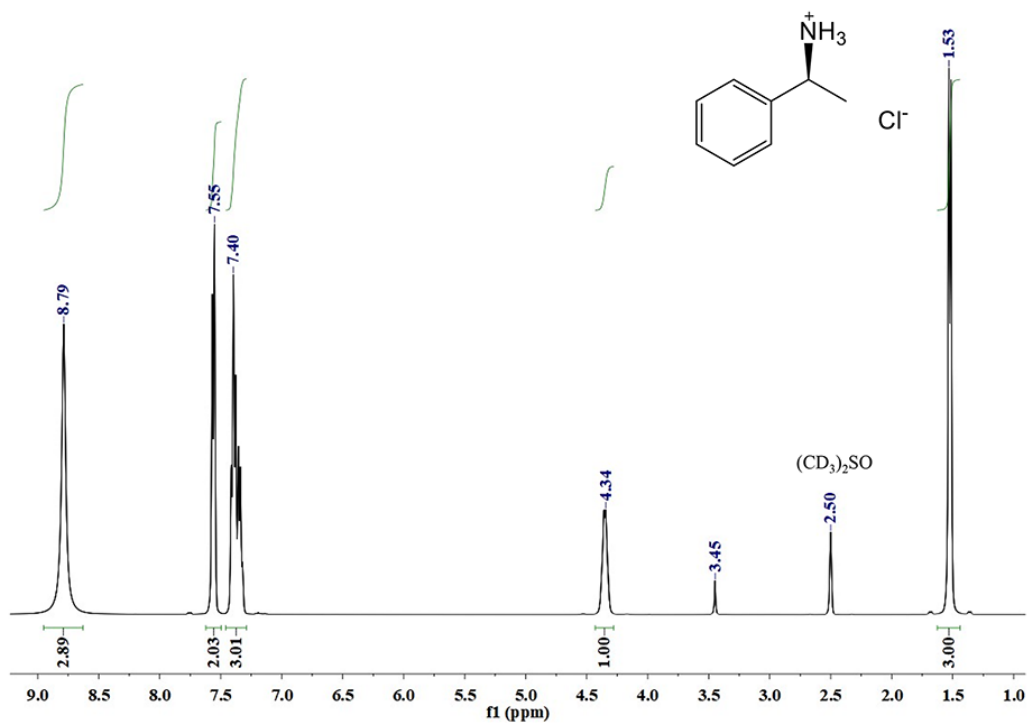

**Figure S31.**  $^1\text{H}$  NMR spectra of *S*-MBACl in  $\text{DMSO-}d_6$ .

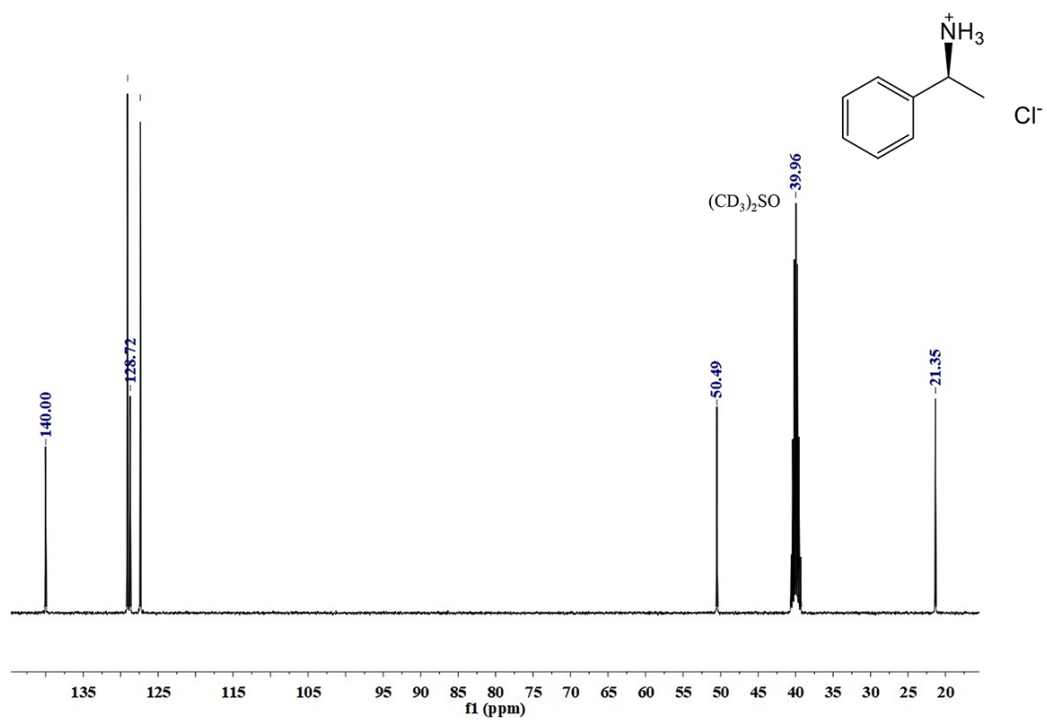

**Figure S32.**  $^{13}\text{C}$  NMR spectra of *S*-MBACl in  $\text{DMSO-}d_6$ .

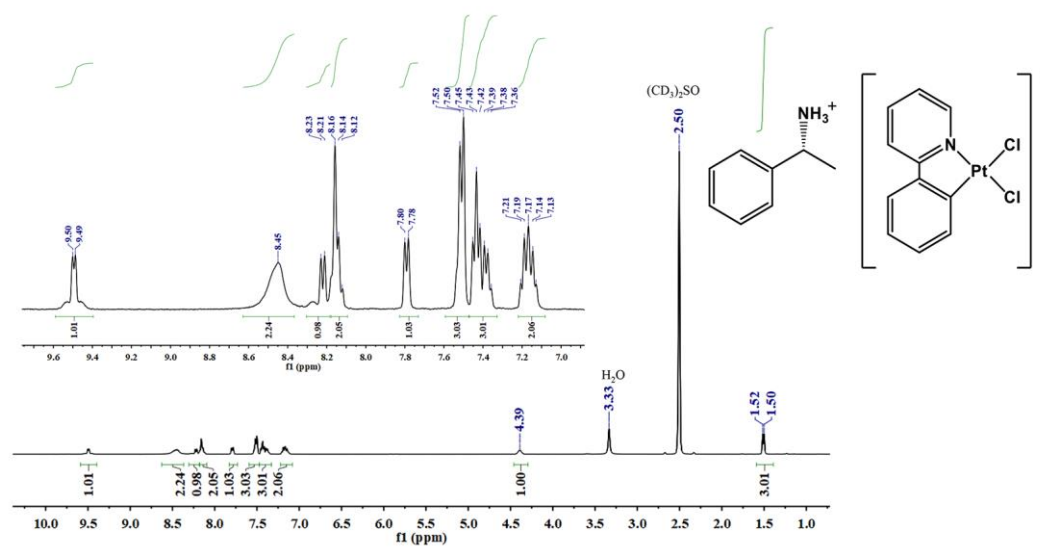

**Figure S33.**  $^1\text{H}$  NMR spectra of  $R\text{-MBA}\cdot[\text{Pt}(\text{ppy})\text{Cl}_2]$  in  $\text{DMSO-}d_6$ .

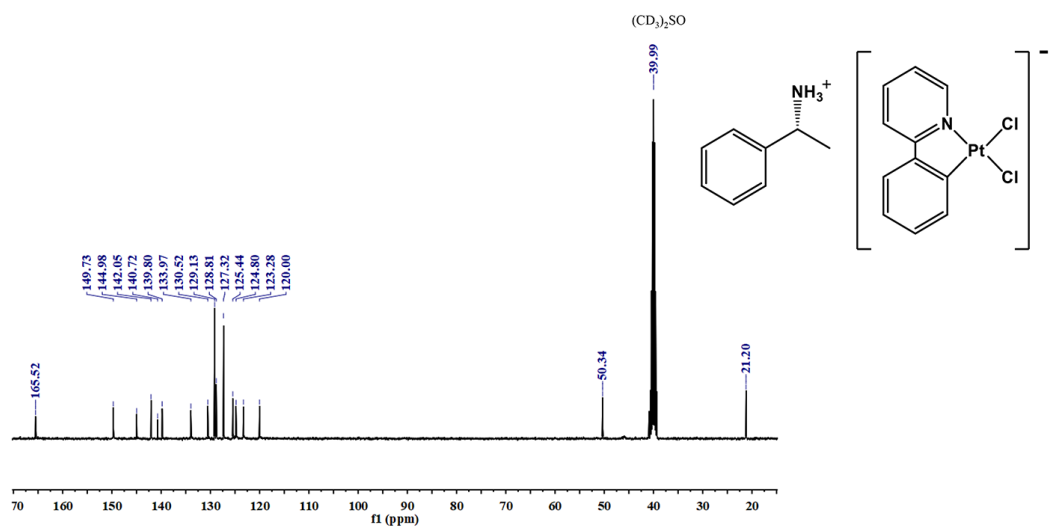

**Figure S34.** <sup>13</sup>C NMR spectra of *R*-MBA·[Pt(ppy)Cl<sub>2</sub>] in DMSO-*d*<sub>6</sub>.



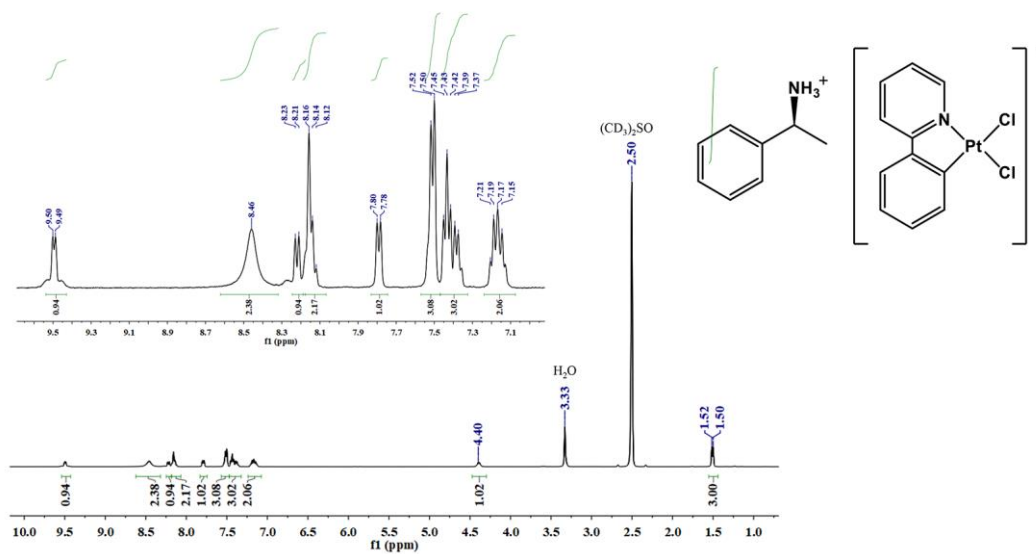

**Figure S35.** <sup>1</sup>H NMR spectra of *S*-MBA·[Pt(ppy)Cl<sub>2</sub>] in DMSO-*d*<sub>6</sub>.

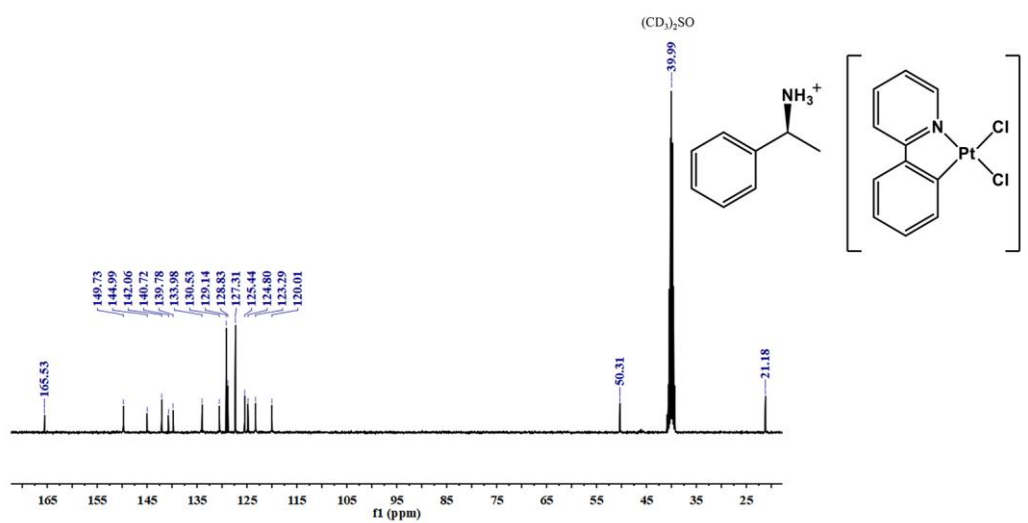

**Figure S36.**  $^{13}\text{C}$  NMR spectra of *S*-MBA·[Pt(ppy)Cl<sub>2</sub>] in DMSO-*d*<sub>6</sub>.

**Table S1.** The crystal density of *R/S*-ABA·[Pt(ppy)Cl<sub>2</sub>] and *R/S*-MBA·[Pt(ppy)Cl<sub>2</sub>] obtained from the single crystal XRD.

|                                         | Temperature, K | $\rho_{\text{calc.}}$ , g/cm <sup>3</sup> | $N_{\text{Pt}}$ , mmol/cm <sup>3</sup> |
|-----------------------------------------|----------------|-------------------------------------------|----------------------------------------|
| <i>R</i> -ABA·[Pt(ppy)Cl <sub>2</sub> ] | 100            | 2.058                                     | 3.927                                  |
| <i>R</i> -ABA·[Pt(ppy)Cl <sub>2</sub> ] | 298            | 2.009                                     | 3.833                                  |
| <i>S</i> -ABA·[Pt(ppy)Cl <sub>2</sub> ] | 100            | 2.055                                     | 3.992                                  |
| <i>S</i> -ABA·[Pt(ppy)Cl <sub>2</sub> ] | 298            | 2.009                                     | 3.833                                  |
| <i>R</i> -MBA·[Pt(ppy)Cl <sub>2</sub> ] | 100            | 1.963                                     | 3.621                                  |
| <i>R</i> -MBA·[Pt(ppy)Cl <sub>2</sub> ] | 298            | 1.908                                     | 3.520                                  |
| <i>S</i> -MBA·[Pt(ppy)Cl <sub>2</sub> ] | 100            | 1.959                                     | 3.614                                  |
| <i>S</i> -MBA·[Pt(ppy)Cl <sub>2</sub> ] | 298            | 1.908                                     | 3.520                                  |

**Table S2.** The components and proportions of the absorption transition were simulated for *R*-ABA·[Pt(ppy)Cl<sub>2</sub>] and *R*-MBA·[Pt(ppy)Cl<sub>2</sub>].

| Absorption                              | Electronic transition          | <i>f</i> | Configuration     | MLCT / % | LLCT / % |
|-----------------------------------------|--------------------------------|----------|-------------------|----------|----------|
| <i>R</i> -ABA·[Pt(ppy)Cl <sub>2</sub> ] | S <sub>0</sub> →S <sub>1</sub> | 0.0156   | HOMO→LUMO (96%)   | 39.3     | 14.8     |
|                                         | S <sub>0</sub> →S <sub>3</sub> | 0.0401   | HOMO-1→LUMO (52%) | 40.1     | 26.5     |
|                                         |                                |          | HOMO-2→LUMO (27%) |          |          |
|                                         |                                |          | HOMO→LUMO+1 (12%) |          |          |
| <i>R</i> -MBA·[Pt(ppy)Cl <sub>2</sub> ] | S <sub>0</sub> →S <sub>1</sub> | 0.0095   | HOMO→LUMO (95%)   | 46.6     | 6.4      |
|                                         | S <sub>0</sub> →S <sub>3</sub> | 0.048    | HOMO-2→LUMO (21%) | 55.1     | 14.9     |
|                                         |                                |          | HOMO-1→LUMO (60%) |          |          |
|                                         |                                |          | HOMO→LUMO+1 (9%)  |          |          |

**Table S3.** Molecular orbital (MO) components of *R*-ABA·[Pt(ppy)Cl<sub>2</sub>] and *R*-MBA·[Pt(ppy)Cl<sub>2</sub>] ground states.

| MO                                      | MO composition                                                                              |        |        | Assignment                                  |
|-----------------------------------------|---------------------------------------------------------------------------------------------|--------|--------|---------------------------------------------|
|                                         | Pt                                                                                          | Cl     | ppy    |                                             |
| <i>R</i> -ABA·[Pt(ppy)Cl <sub>2</sub> ] |                                                                                             |        |        |                                             |
| LUMO+1                                  | 1.5%                                                                                        | 0.3 %  | 93.8 % | $\pi^*(\text{ppy})$                         |
| LUMO                                    | 7.1% (2.8% $d_{x^2-y^2}$ +1.0% $d_{yz}$ )                                                   | 1.2 %  | 90.8 % | $d(\text{Cu})+\pi^*(\text{ppy})$            |
| HOMO                                    | 56.2% (4.5% $d_{x^2-y^2}$ +31.8% $d_{z^2}$ +10.6% $d_{xy}$ +2.2% $d_{xz}$ +6.9% $d_{yz}$ )  | 7.9 %  | 35.2 % | $d(\text{Pt})+p(\text{Cl})+\pi(\text{ppy})$ |
| HOMO-1                                  | 65.5% (19.3% $d_{x^2-y^2}$ +2.5% $d_{z^2}$ +21.8% $d_{xy}$ +1.4% $d_{xz}$ +18.6% $d_{yz}$ ) | 23.1 % | 10.9 % | $d(\text{Pt})+p(\text{Cl})+\pi(\text{ppy})$ |
| HOMO-2                                  | 79.2% (11.2% $d_{x^2-y^2}$ +1.9% $d_{z^2}$ +18.3% $d_{xy}$ +32.3% $d_{xz}$ +3.2% $d_{yz}$ ) | 6.3 %  | 13.7 % | $d(\text{Pt})+p(\text{Cl})+\pi(\text{ppy})$ |
| <i>R</i> -MBA·[Pt(ppy)Cl <sub>2</sub> ] |                                                                                             |        |        |                                             |
| LUMO+1                                  | 1.9%                                                                                        | 0.2 %  | 95.7%  | $\pi^*(\text{ppy})$                         |
| LUMO                                    | 8.3% (1.6% $d_{xy}$ +2.0% $d_{yz}$ )                                                        | 1.4 %  | 88.6 % | $d(\text{Pt})+\pi^*(\text{ppy})$            |
| HOMO                                    | 49.2% (7.2% $d_{x^2-y^2}$ +32.5% $d_{z^2}$ +3.0% $d_{xy}$ +4.1% $d_{xz}$ +2.3% $d_{yz}$ )   | 16.8 % | 33.8 % | $d(\text{Pt})+p(\text{Cl})+\pi(\text{ppy})$ |
| HOMO-1                                  | 54.7% (4.0% $d_{z^2}$ +8.5% $d_{xy}$ +4.6% $d_{xz}$ +37.1% $d_{yz}$ )                       | 28.4 % | 16.4 % | $d(\text{Pt})+p(\text{Cl})+\pi(\text{ppy})$ |
| HOMO-2                                  | 46.4% (35.6% $d_{x^2-y^2}$ +1.7% $d_{z^2}$ +6.7% $d_{xy}$ +1.6% $d_{xz}$ )                  | 40.2 % | 13.1 % | $d(\text{Pt})+p(\text{Cl})+\pi(\text{ppy})$ |

**Table S4.** Single crystal XRD analysis data and structural refinement for *R*-ABA·[Pt(ppy)Cl<sub>2</sub>] at different temperatures.

| Temperature/K                                                 | 100                                                                          | 298                                                                          |
|---------------------------------------------------------------|------------------------------------------------------------------------------|------------------------------------------------------------------------------|
| CCDC                                                          | 2365460                                                                      | 2365461                                                                      |
| Crystal system                                                | monoclinic                                                                   | monoclinic                                                                   |
| Space group                                                   | <i>P</i> 2 <sub>1</sub>                                                      | <i>P</i> 2 <sub>1</sub>                                                      |
| <i>a</i> /Å                                                   | 13.74620(10)                                                                 | 13.74920(10)                                                                 |
| <i>b</i> /Å                                                   | 7.54290(10)                                                                  | 7.66790(10)                                                                  |
| <i>c</i> /Å                                                   | 16.79970(10)                                                                 | 16.92060(10)                                                                 |
| $\alpha$ /°                                                   | 90                                                                           | 90                                                                           |
| $\beta$ /°                                                    | 103.6710(10)                                                                 | 103.6330(10)                                                                 |
| $\gamma$ /°                                                   | 90                                                                           | 90                                                                           |
| Volume/Å <sup>3</sup>                                         | 1692.55(3)                                                                   | 1733.64(3)                                                                   |
| <i>Z</i>                                                      | 4                                                                            | 4                                                                            |
| $\rho_{\text{calc}}$ g/cm <sup>3</sup>                        | 2.058                                                                        | 2.009                                                                        |
| <i>F</i> (000)                                                | 1000.0                                                                       | 1000.0                                                                       |
| Radiation                                                     | Cu K $\alpha$ ( $\lambda$ = 1.54184)                                         | Cu K $\alpha$ ( $\lambda$ = 1.54184)                                         |
| Reflections collected                                         | 10528                                                                        | 23651                                                                        |
| Independent reflections                                       | 4959 [ <i>R</i> <sub>int</sub> = 0.0366, <i>R</i> <sub>sigma</sub> = 0.0448] | 6667 [ <i>R</i> <sub>int</sub> = 0.0624, <i>R</i> <sub>sigma</sub> = 0.0450] |
| Data/restraints/parameters                                    | 4959/13/402                                                                  | 6667/1/404                                                                   |
| Goodness-of-fit on <i>F</i> <sup>2</sup>                      | 0.752                                                                        | 0.869                                                                        |
| Final <i>R</i> indexes [ <i>I</i> >= 2 $\sigma$ ( <i>I</i> )] | <i>R</i> <sub>1</sub> = 0.0314, w <i>R</i> <sub>2</sub> = 0.0911             | <i>R</i> <sub>1</sub> = 0.0390, w <i>R</i> <sub>2</sub> = 0.1089             |
| Final <i>R</i> indexes [all data]                             | <i>R</i> <sub>1</sub> = 0.0338, w <i>R</i> <sub>2</sub> = 0.0947             | <i>R</i> <sub>1</sub> = 0.0429, w <i>R</i> <sub>2</sub> = 0.1125             |
| Largest diff. peak/hole / e Å <sup>-3</sup>                   | 1.42/-1.72                                                                   | 1.79/-2.22                                                                   |
| Flack parameter                                               | 0.009(15)                                                                    | 0.05(2)                                                                      |

**Table S5.** Single crystal XRD analysis data and structural refinement for *S*-ABA · [Pt(ppy)Cl<sub>2</sub>] at different temperatures.

| Temperature/K                                                 | 100                                                                          | 298                                                                          |
|---------------------------------------------------------------|------------------------------------------------------------------------------|------------------------------------------------------------------------------|
| CCDC                                                          | 2365462                                                                      | 2365463                                                                      |
| Crystal system                                                | monoclinic                                                                   | monoclinic                                                                   |
| Space group                                                   | <i>P</i> 2 <sub>1</sub>                                                      | <i>P</i> 2 <sub>1</sub>                                                      |
| <i>a</i> /Å                                                   | 13.7103(4)                                                                   | 13.73760(10)                                                                 |
| <i>b</i> /Å                                                   | 7.5618(3)                                                                    | 7.67280(10)                                                                  |
| <i>c</i> /Å                                                   | 16.8169(6)                                                                   | 16.9169(2)                                                                   |
| $\alpha$ /°                                                   | 90                                                                           | 90                                                                           |
| $\beta$ /°                                                    | 103.556(3)                                                                   | 103.6160(10)                                                                 |
| $\gamma$ /°                                                   | 90                                                                           | 90                                                                           |
| Volume/Å <sup>3</sup>                                         | 1694.91(11)                                                                  | 1733.03(3)                                                                   |
| <i>Z</i>                                                      | 4                                                                            | 4                                                                            |
| $\rho_{\text{calc}}$ g/cm <sup>3</sup>                        | 2.055                                                                        | 2.009                                                                        |
| <i>F</i> (000)                                                | 1000.0                                                                       | 1000.0                                                                       |
| Radiation                                                     | Cu K $\alpha$ ( $\lambda$ = 1.54184)                                         | Cu K $\alpha$ ( $\lambda$ = 1.54184)                                         |
| Reflections collected                                         | 14386                                                                        | 17437                                                                        |
| Independent reflections                                       | 5933 [ <i>R</i> <sub>int</sub> = 0.0645, <i>R</i> <sub>sigma</sub> = 0.0706] | 6892 [ <i>R</i> <sub>int</sub> = 0.0392, <i>R</i> <sub>sigma</sub> = 0.0443] |
| Data/restraints/parameters                                    | 5933/13/402                                                                  | 6892/1/402                                                                   |
| Goodness-of-fit on <i>F</i> <sup>2</sup>                      | 0.991                                                                        | 1.110                                                                        |
| Final <i>R</i> indexes [ <i>I</i> >= 2 $\sigma$ ( <i>I</i> )] | <i>R</i> <sub>1</sub> = 0.0406, w <i>R</i> <sub>2</sub> = 0.1017             | <i>R</i> <sub>1</sub> = 0.0280, w <i>R</i> <sub>2</sub> = 0.0761             |
| Final <i>R</i> indexes [all data]                             | <i>R</i> <sub>1</sub> = 0.0461, w <i>R</i> <sub>2</sub> = 0.1050             | <i>R</i> <sub>1</sub> = 0.0312, w <i>R</i> <sub>2</sub> = 0.0783             |
| Largest diff. peak/hole / e Å <sup>-3</sup>                   | 2.18/-2.00                                                                   | 0.85/-1.04                                                                   |
| Flack parameter                                               | -0.02(2)                                                                     | 0.005(17)                                                                    |

**Table S6.** Single crystal XRD analysis data and structural refinement for *R*-MBA·[Pt(ppy)Cl<sub>2</sub>] at different temperatures

| Temperature/K                                        | 100                                                                          | 298                                                                          |
|------------------------------------------------------|------------------------------------------------------------------------------|------------------------------------------------------------------------------|
| CCDC                                                 | 2365464                                                                      | 2365465                                                                      |
| Crystal system                                       | orthorhombic                                                                 | orthorhombic                                                                 |
| Space group                                          | <i>P</i> 2 <sub>1</sub> 2 <sub>1</sub> 2 <sub>1</sub>                        | <i>P</i> 2 <sub>1</sub> 2 <sub>1</sub> 2 <sub>1</sub>                        |
| <i>a</i> /Å                                          | 23.2773(4)                                                                   | 23.2671(10)                                                                  |
| <i>b</i> /Å                                          | 6.02850(10)                                                                  | 6.1257(3)                                                                    |
| <i>c</i> /Å                                          | 13.0805(2)                                                                   | 13.2471(6)                                                                   |
| $\alpha$ /°                                          | 90                                                                           | 90                                                                           |
| $\beta$ /°                                           | 90                                                                           | 90                                                                           |
| $\gamma$ /°                                          | 90                                                                           | 90                                                                           |
| Volume/Å <sup>3</sup>                                | 1835.55(5)                                                                   | 1888.07(15)                                                                  |
| <i>Z</i>                                             | 4                                                                            | 4                                                                            |
| $\rho_{\text{calc}}$ g/cm <sup>3</sup>               | 1.963                                                                        | 1.908                                                                        |
| <i>F</i> (000)                                       | 1040.0                                                                       | 1040.0                                                                       |
| Radiation                                            | Cu K $\alpha$ ( $\lambda$ = 1.54184)                                         | Mo K $\alpha$ ( $\lambda$ = 0.71073)                                         |
| Reflections collected                                | 7961                                                                         | 12683                                                                        |
| Independent reflections                              | 3196 [ <i>R</i> <sub>int</sub> = 0.0442, <i>R</i> <sub>sigma</sub> = 0.0505] | 4748 [ <i>R</i> <sub>int</sub> = 0.0313, <i>R</i> <sub>sigma</sub> = 0.0396] |
| Data/restraints/parameters                           | 3196/0/219                                                                   | 4748/0/219                                                                   |
| Goodness-of-fit on <i>F</i> <sup>2</sup>             | 1.067                                                                        | 0.998                                                                        |
| Final <i>R</i> indexes [ <i>I</i> ≥ 2σ ( <i>I</i> )] | <i>R</i> <sub>1</sub> = 0.0387, w <i>R</i> <sub>2</sub> = 0.1055             | <i>R</i> <sub>1</sub> = 0.0285, w <i>R</i> <sub>2</sub> = 0.0510             |
| Final <i>R</i> indexes [all data]                    | <i>R</i> <sub>1</sub> = 0.0405, w <i>R</i> <sub>2</sub> = 0.1068             | <i>R</i> <sub>1</sub> = 0.0383, w <i>R</i> <sub>2</sub> = 0.0525             |
| Largest diff. peak/hole / e Å <sup>-3</sup>          | 2.09/-2.26                                                                   | 0.92/-0.57                                                                   |
| Flack parameter                                      | -0.012(15)                                                                   | -0.005(5)                                                                    |



**Table S7.** Single crystal XRD analysis data and structure refinement for *S*-MBA·[Pt(ppy)Cl<sub>2</sub>] at different temperatures.

| Temperature/K                                        | 100                                                                          | 298                                                                          |
|------------------------------------------------------|------------------------------------------------------------------------------|------------------------------------------------------------------------------|
| CCDC                                                 | 2365466                                                                      | 2365467                                                                      |
| Crystal system                                       | orthorhombic                                                                 | orthorhombic                                                                 |
| Space group                                          | <i>P</i> 2 <sub>1</sub> 2 <sub>1</sub> 2 <sub>1</sub>                        | <i>P</i> 2 <sub>1</sub> 2 <sub>1</sub> 2 <sub>1</sub>                        |
| <i>a</i> /Å                                          | 6.02970(10)                                                                  | 6.1233(7)                                                                    |
| <i>b</i> /Å                                          | 13.0932(3)                                                                   | 13.2555(14)                                                                  |
| <i>c</i> /Å                                          | 23.2882(5)                                                                   | 23.260(3)                                                                    |
| $\alpha$ /°                                          | 90                                                                           | 90                                                                           |
| $\beta$ /°                                           | 90                                                                           | 90                                                                           |
| $\gamma$ /°                                          | 90                                                                           | 90                                                                           |
| Volume/Å <sup>3</sup>                                | 1838.56(7)                                                                   | 1888.0 (4)                                                                   |
| <i>Z</i>                                             | 4                                                                            | 4                                                                            |
| $\rho_{\text{calc}}$ g/cm <sup>3</sup>               | 1.959                                                                        | 1.908                                                                        |
| <i>F</i> (000)                                       | 1040.0                                                                       | 1040.0                                                                       |
| Radiation                                            | Cu K $\alpha$ ( $\lambda$ = 1.54184)                                         | Mo K $\alpha$ ( $\lambda$ = 0.71073)                                         |
| Reflections collected                                | 8483                                                                         | 9545                                                                         |
| Independent reflections                              | 3185 [ <i>R</i> <sub>int</sub> = 0.1172, <i>R</i> <sub>sigma</sub> = 0.1166] | 3311 [ <i>R</i> <sub>int</sub> = 0.0814, <i>R</i> <sub>sigma</sub> = 0.0903] |
| Data/restraints/parameters                           | 3185/30/183                                                                  | 3311/1/183                                                                   |
| Goodness-of-fit on <i>F</i> <sup>2</sup>             | 1.021                                                                        | 0.981                                                                        |
| Final <i>R</i> indexes [ <i>I</i> ≥ 2σ ( <i>I</i> )] | <i>R</i> <sub>1</sub> = 0.0756, w <i>R</i> <sub>2</sub> = 0.1608             | <i>R</i> <sub>1</sub> = 0.0455, w <i>R</i> <sub>2</sub> = 0.0827             |
| Final <i>R</i> indexes [all data]                    | <i>R</i> <sub>1</sub> = 0.0969, w <i>R</i> <sub>2</sub> = 0.1689             | <i>R</i> <sub>1</sub> = 0.0726, w <i>R</i> <sub>2</sub> = 0.0888             |
| Largest diff. peak/hole / e Å <sup>-3</sup>          | 3.46/-1.86                                                                   | 0.83/-0.59                                                                   |
| Flack parameter                                      | -0.05(3)                                                                     | -0.000(17)                                                                   |

**Table S8.** Summary of the  $g_{\text{lum}}$ , electric transition dipole moment ( $|\mu_e|$ ) and magnetic transition dipole moment ( $|\mu_m|$ ) of the CPPL of *R/S*-ABA·[Pt(ppy)Cl<sub>2</sub>] and *R/S*-MBA·[Pt(ppy)Cl<sub>2</sub>].

|                                         | $g_{\text{lum}}$      | $ \mu_e $<br>[Debye] | $ \mu_m $<br>[Bohr Mag.] |
|-----------------------------------------|-----------------------|----------------------|--------------------------|
| <i>R</i> -ABA·[Pt(ppy)Cl <sub>2</sub> ] | $+1.4 \times 10^{-3}$ | 1.79                 | 0.06                     |
| <i>S</i> -ABA·[Pt(ppy)Cl <sub>2</sub> ] | $-1.8 \times 10^{-3}$ | 1.76                 | 0.09                     |
| <i>R</i> -MBA·[Pt(ppy)Cl <sub>2</sub> ] | $+4.4 \times 10^{-3}$ | 2.14                 | 0.26                     |
| <i>S</i> -MBA·[Pt(ppy)Cl <sub>2</sub> ] | $-2.8 \times 10^{-3}$ | 1.99                 | 0.15                     |

### III Supplementary References

- 1 D. S. Black, G. B. Deacon and G. L. J. A. J. o. C. Edwards, *Aust. J. Chem.*, 1994, **47**, 217-227.
- 2 M. Yoshida, V. Sääsk, D. Saito, N. Yoshimura, J. Takayama, S. Hiura, A. Murayama, K. Pöhako-Esko, A. Kobayashi and M. Kato, *Adv. Opt. Mater.*, 2022, **10**, 2102614.
- 3 H. Lu, T. He, H. Wu, F. Qi, H. Wang, B. Sun, T. Shao, T. Qiao, H.-L. Zhang, D. Sun, Y. Chen, Z. Tang and G. Long, *Adv. Funct. Mater.*, 2024, **34**, 2308862.
- 4 K. Momma and F. Izumi, *J. Appl. Crystallogr.*, 2008, **41**, 653-658.
- 5 A. R. Lim, G. T. Schueneman and B. M. Novak, *Solid State Commun.*, 1999, **109**, 465-470.
- 6 R. Inoue, R. Kondo and Y. Morisaki, *Chem. Commun.*, 2020, **56**, 15438-15441.
- 7 G. Kresse and J. Furthmüller, *Phys. Rev. B*, 1996, **54**, 11169-11186.
- 8 P. E. Blöchl, *Phy. Rev. B*, 1994, **50**, 17953-17979.
- 9 J. P. Perdew, A. Ruzsinszky, G. I. Csonka, O. A. Vydrov, G. E. Scuseria, L. A. Constantin, X. Zhou and K. Burke, *Phys. Rev. Lett.*, 2008, **100**, 136406.
- 10 S. Grimme, S. Ehrlich and L. Goerigk, *J. Comput. Chem.*, 2011, **32**, 1456-1465.
- 11 V. Wang, N. Xu, J.-C. Liu, G. Tang and W.-T. Geng, *Comput. Phys. Commun.*, 2021, **267**, 108033.
- 12 E. Runge and E. K. U. Gross, *Phys. Rev. Lett.*, 1984, **52**, 997-1000.
- 13 M. J. Frisch, G. W. Trucks, H. B. Schlegel, G. E. Scuseria, M. A. Robb, J. R. Cheeseman, G. Scalmani, V. Barone, G. A. Petersson, H. Nakatsuji, X. Li, M. Caricato, A. V. Marenich, J. Bloino, B. G. Janesko, R. Gomperts, B. Mennucci, H. P. Hratchian, J. V. Ortiz, A. F. Izmaylov, J. L. Sonnenberg, Williams, F. Ding, F. Lipparini, F. Egidi, J. Goings, B. Peng, A. Petrone, T. Henderson, D. Ranasinghe, V. G. Zakrzewski, J. Gao, N. Rega, G. Zheng, W. Liang, M. Hada, M. Ehara, K. Toyota, R. Fukuda, J. Hasegawa, M. Ishida, T. Nakajima, Y. Honda, O. Kitao, H. Nakai, T. Vreven, K. Throssell, J. A. Montgomery Jr., J. E. Peralta, F. Ogliaro, M. J. Bearpark, J. J. Heyd, E. N. Brothers, K. N. Kudin, V. N. Staroverov, T. A. Keith, R. Kobayashi, J. Normand, K. Raghavachari, A. P. Rendell, J. C. Burant, S. S. Iyengar, J. Tomasi, M. Cossi, J. M. Millam, M. Klene, C. Adamo, R. Cammi, J. W. Ochterski, R. L. Martin, K. Morokuma, O. Farkas, J. B. Foresman, D. J. Fox, Wallingford, CT, 2016.
- 14 L. W. Chung, W. M. C. Sameera, R. Ramozzi, A. J. Page, M. Hatanaka, G. P. Petrova, T. V. Harris, X. Li, Z. Ke, F. Liu, H.-B. Li, L. Ding and K. Morokuma, *Chem. Rev.*, 2015, **115**, 5678-5796.
- 15 P. J. Hay and W. R. Wadt, *J. Chem. Phys.*, 1985, **82**, 299-310.
- 16 C. Adamo and V. Barone, *Chem. Phys. Lett.*, 1999, **314**, 152-157.
- 17 S. Grimme, J. Antony, S. Ehrlich and H. Krieg, *J. Chem. Phys.*, 2010, **132**, 154104.
- 18 Z. Shuai, *Chin. J. Chem.*, 2020, **38**, 1223-1232.
